# Supplementary material for: Frailty and mortality associations in patients with COVID‐19: a systematic review and meta‐analysis
Source: PubMed Central journal article supplement — Intern Med J. 2022 Mar 21;52(5):724–39. doi: 10.1111/imj.15698 (PMC9314619; doi:10.1111/imj.15698), 2022-03-21

Supplementary Figure 1: PRISMA flowchart of study inclusions and exclusions.

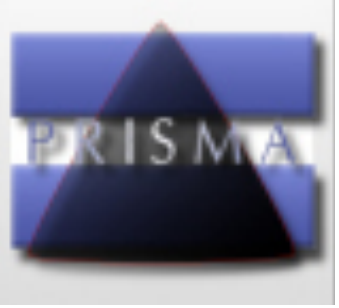

### PRISMA 2009 Flow Diagram

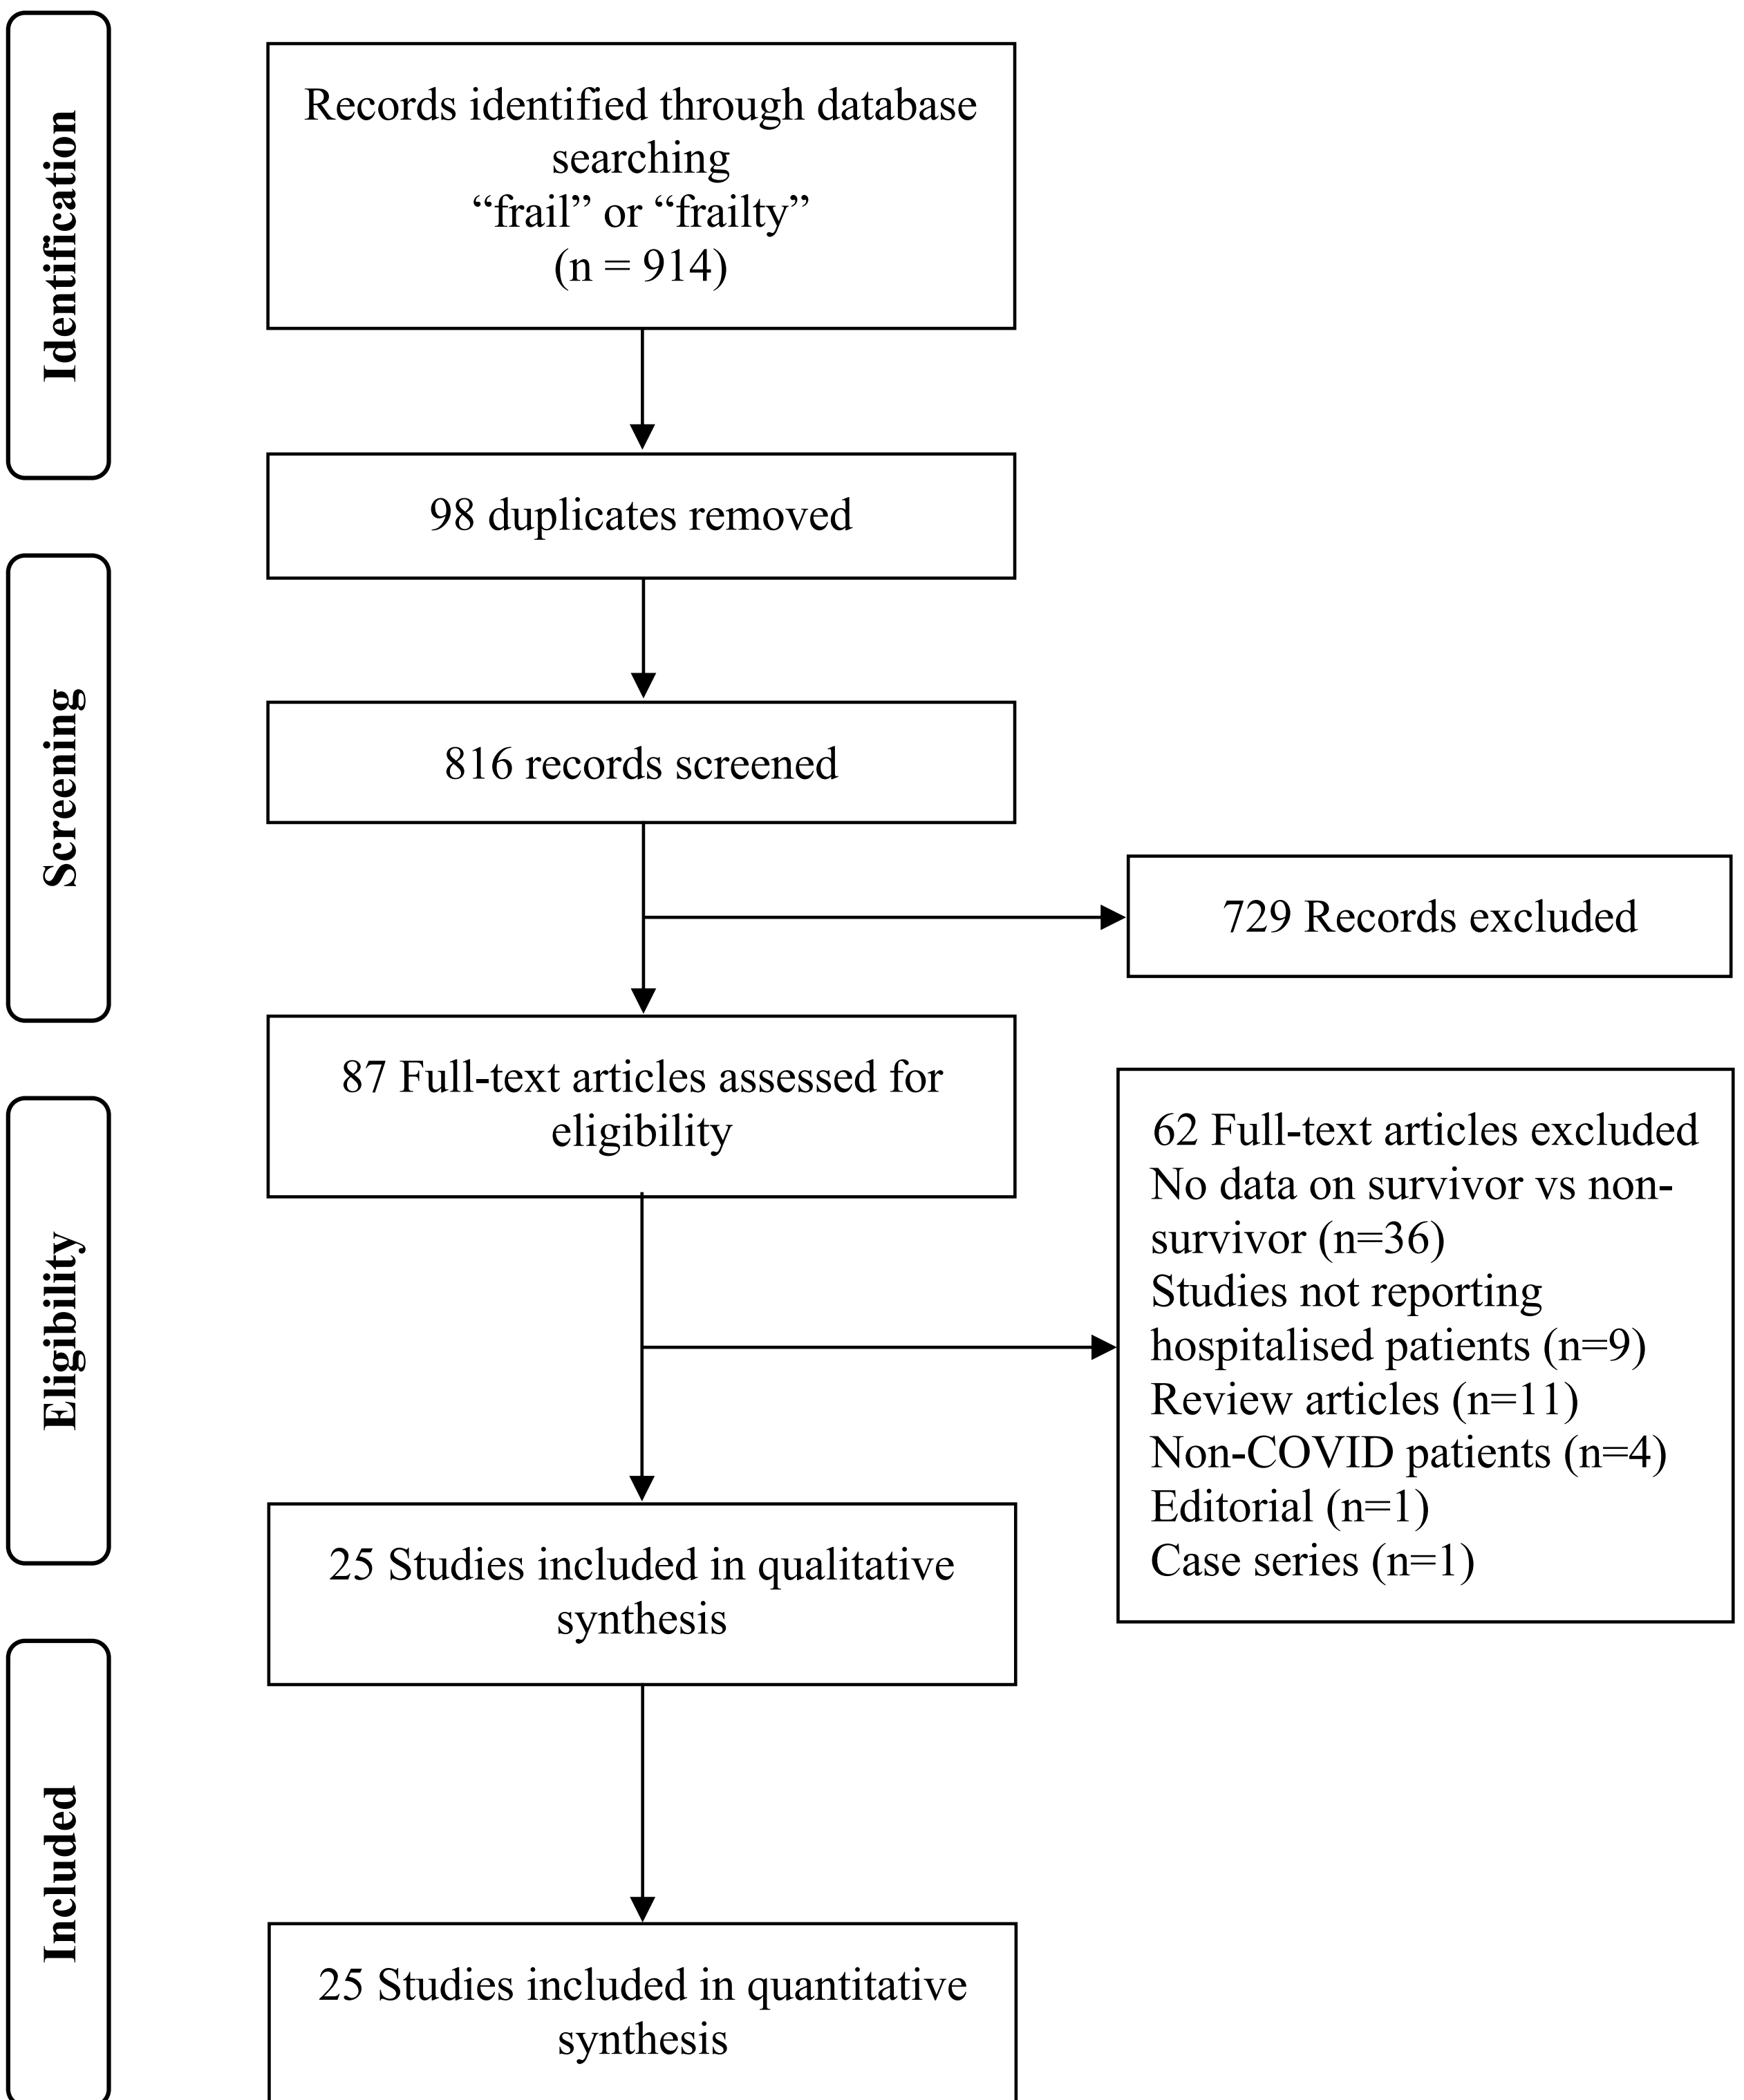

From: Moher D, Liberati A, Tetzlaff J, Altman DG, The PRISMA Group (2009). Preferred Reporting Items for Systematic Reviews and Meta-Analyses: The PRISMA Statement. PLoS Med 6(7): e1000097. doi:10.1371/journal.pmed1000097

For more information, visit [www.prisma-statement.org](http://www.prisma-statement.org).

## Supplementary Figure 2: Standardised mean difference in age and age-stratified raw outcomes between survivors and non-survivors

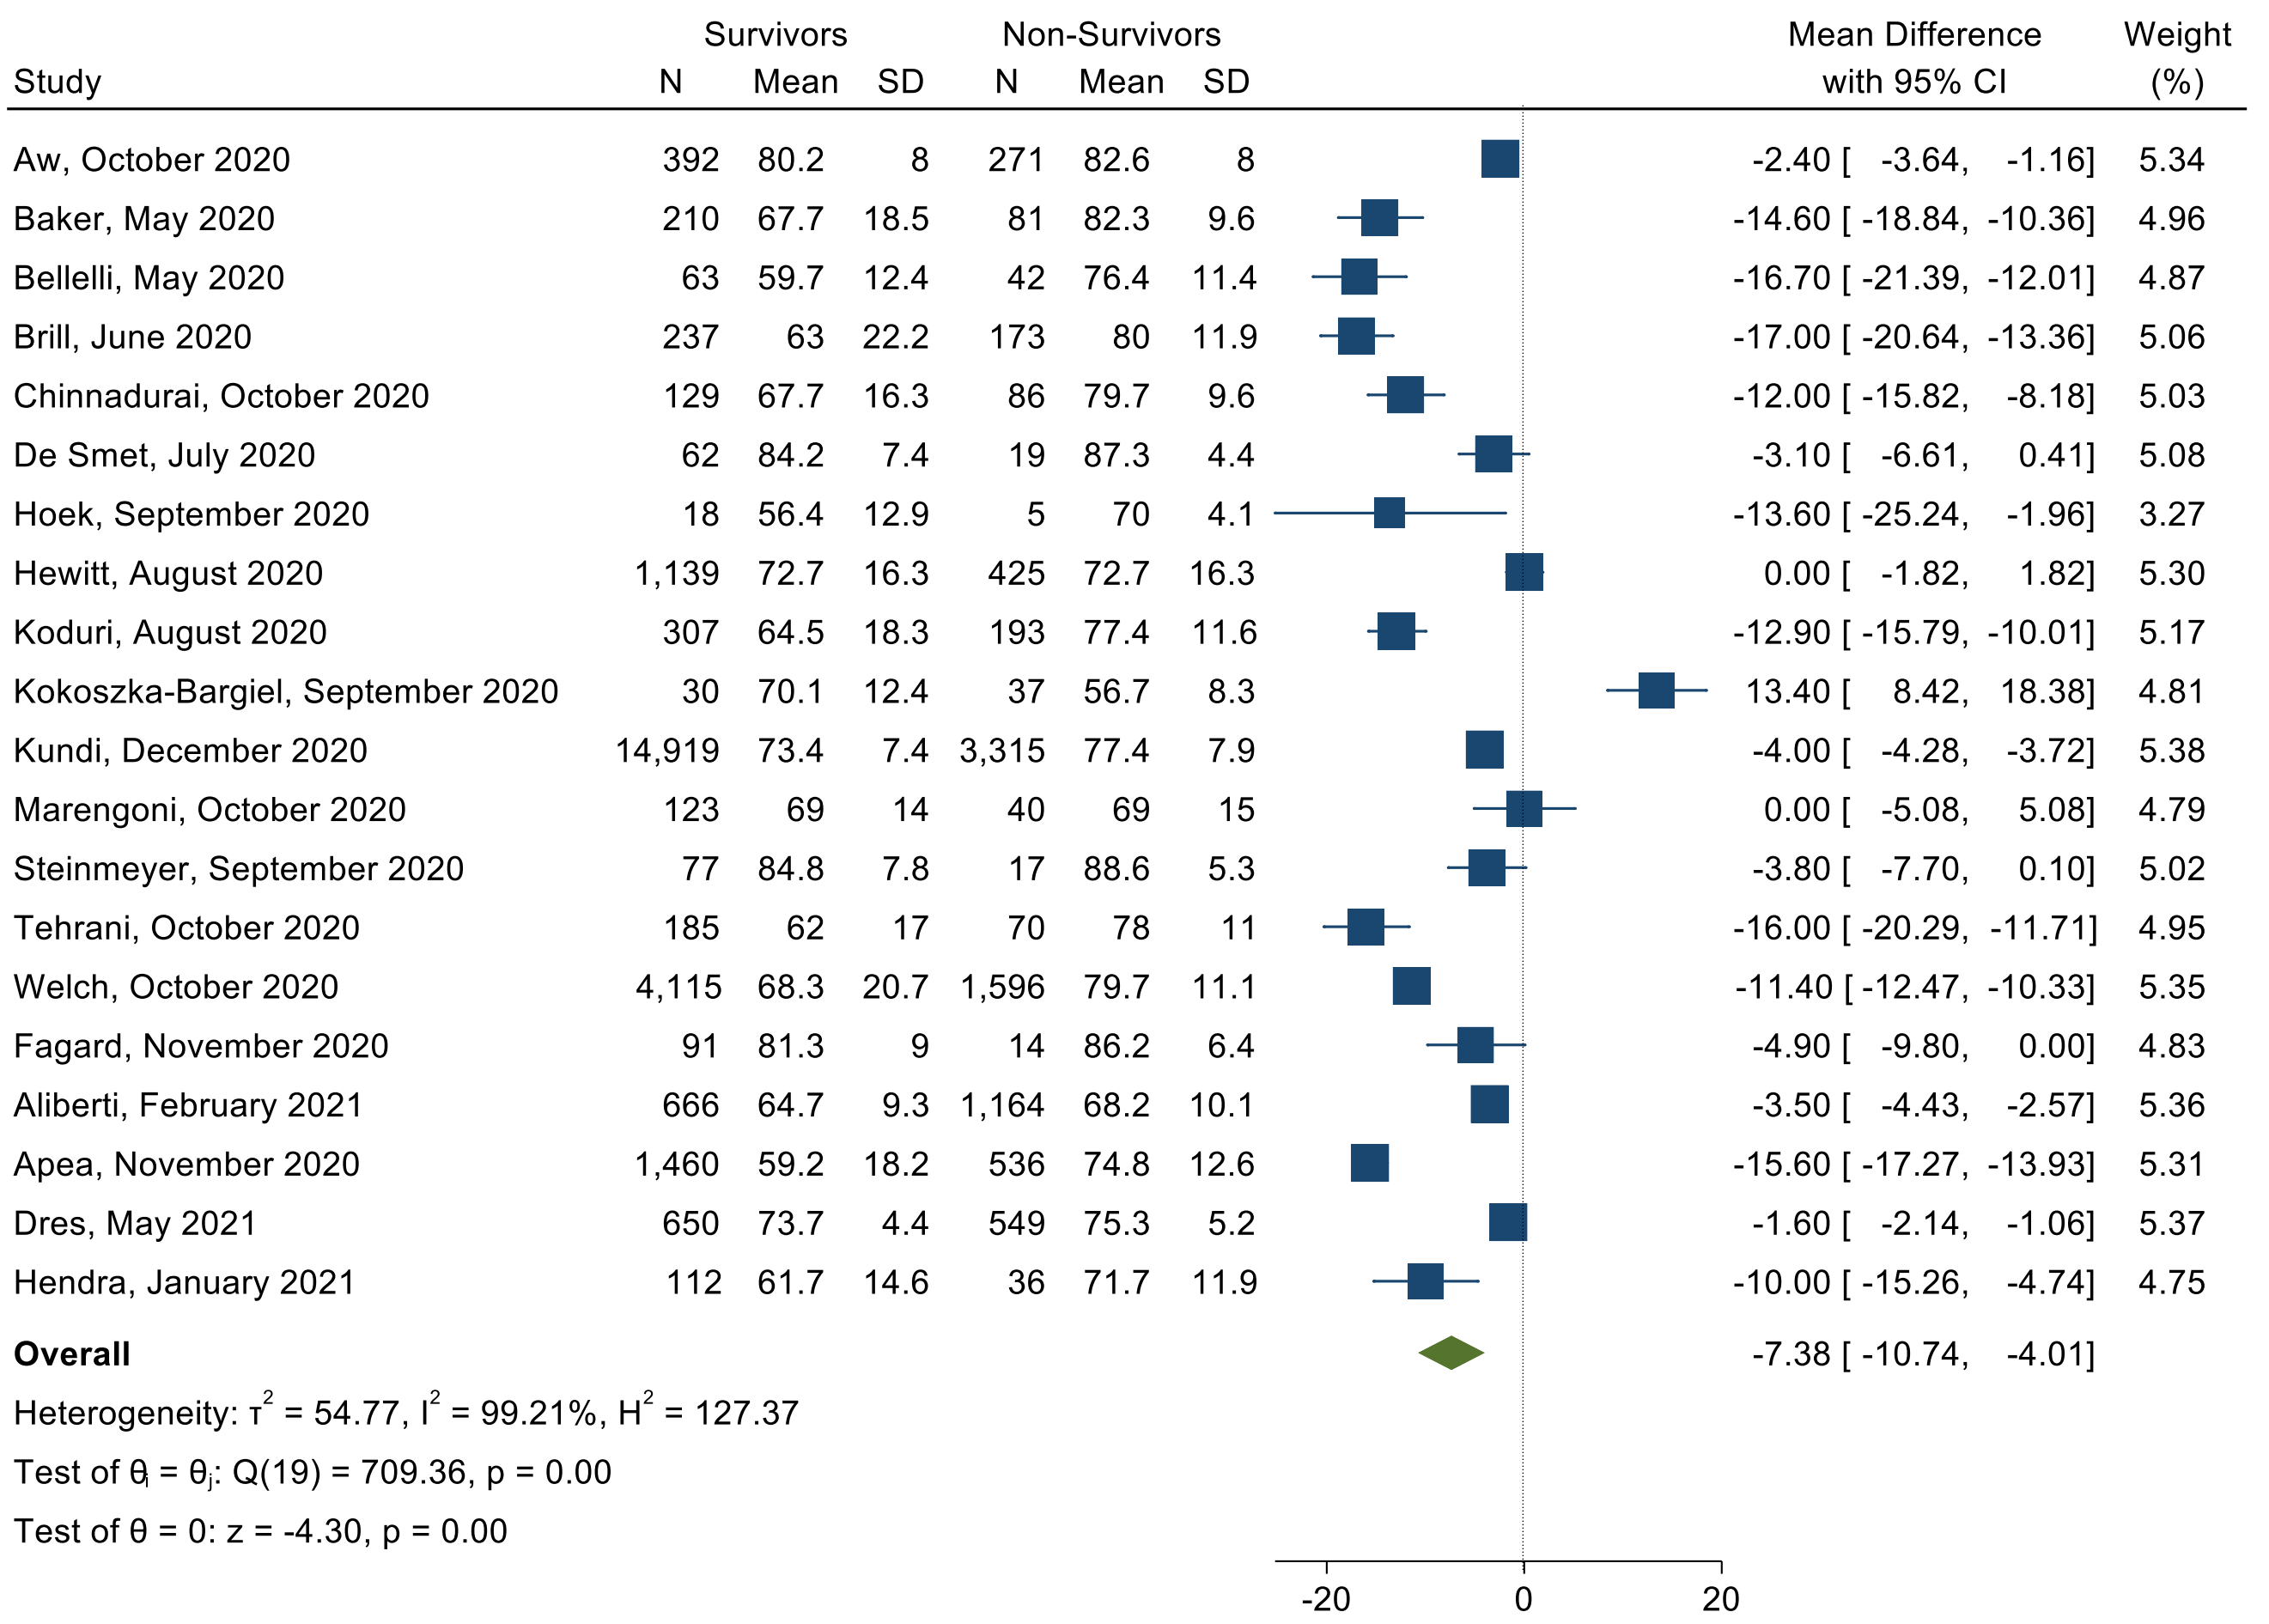

Random-effects REML model

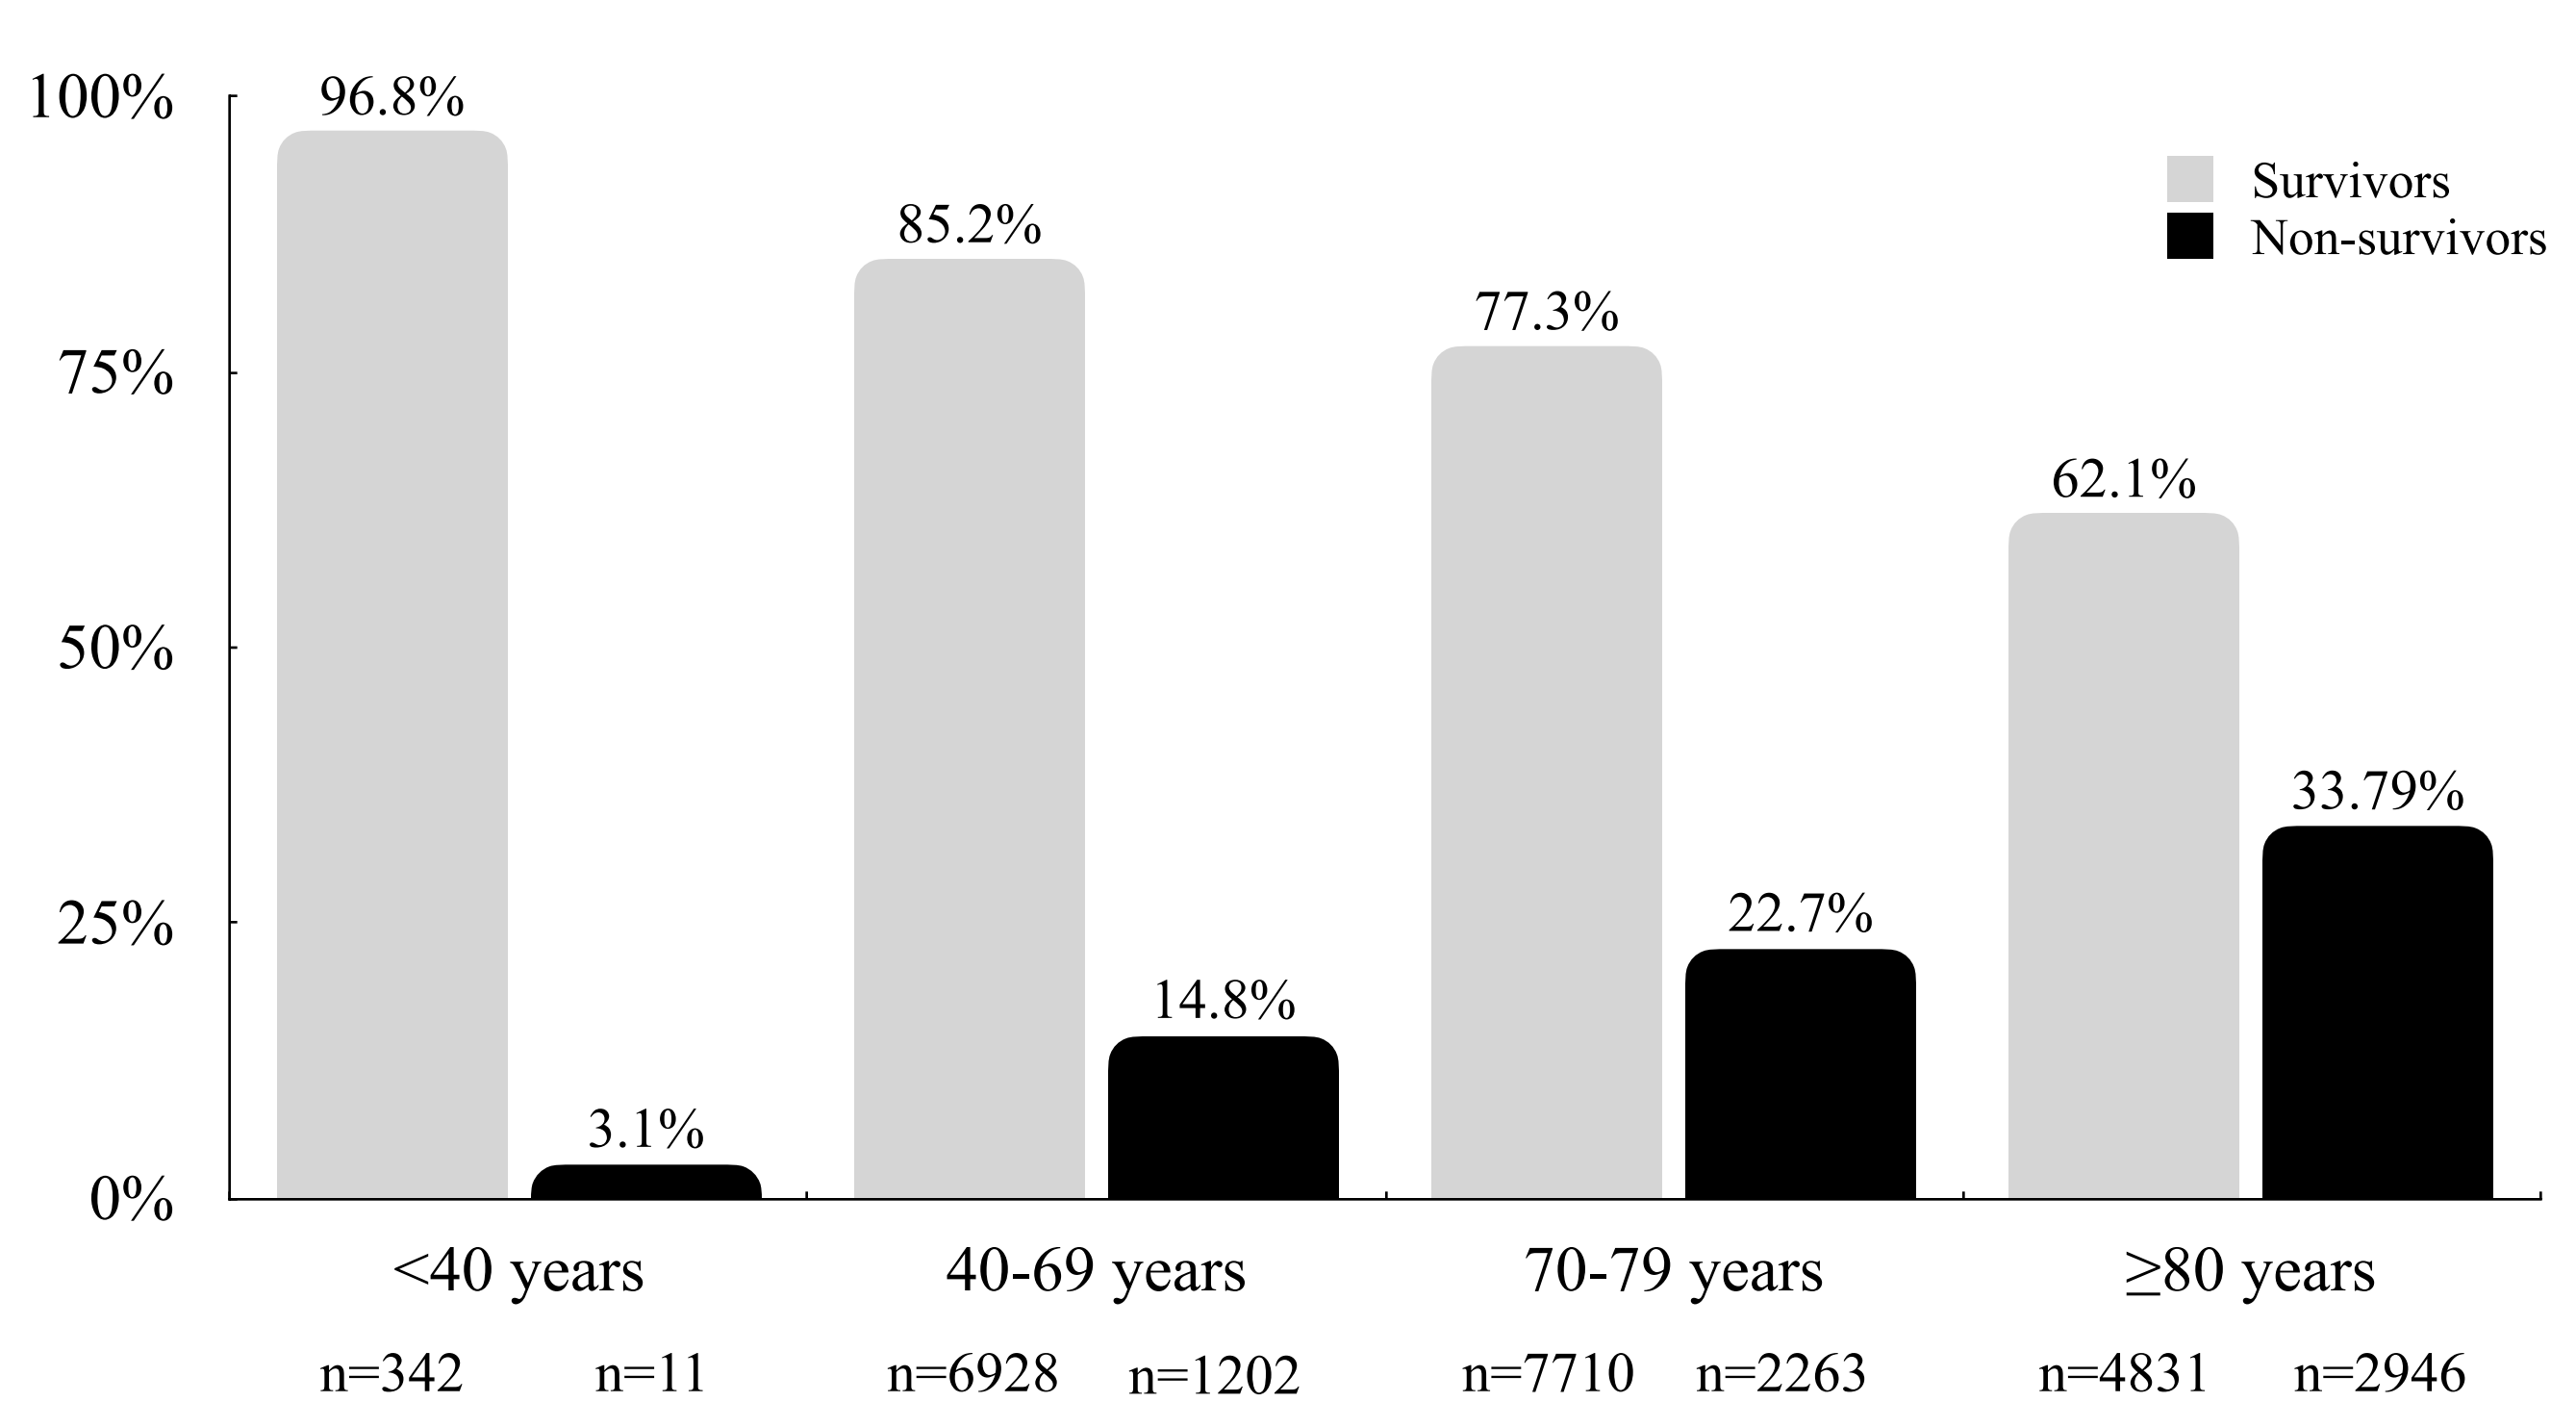

# Supplementary Figure 3: Age-stratified gender difference amongst survivors and non-survivors.

## (3a) Funnel plot

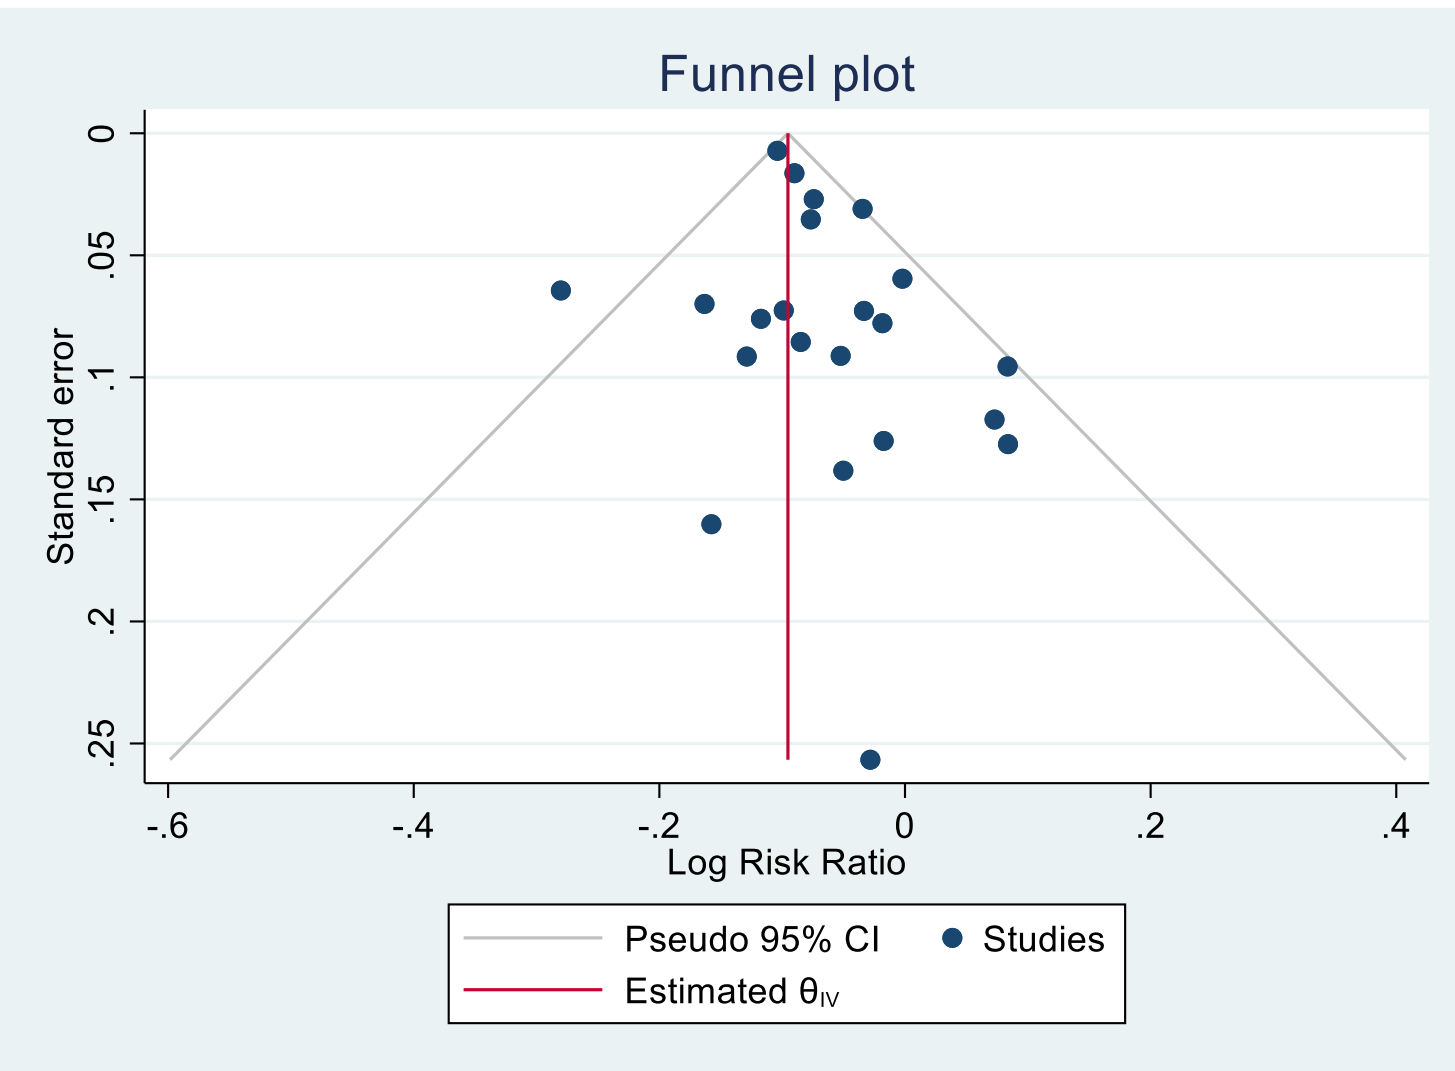

## (3b) Egger's Test

```

. . meta bias, egger

Effect-size label:  Log Risk Ratio
Effect size:       _meta_es
Std. Err.:        _meta_se

Regression-based Egger test for small-study effects
Random-effects model
Method: REML

H0: beta1 = 0; no small-study effects
      beta1 =      0.53
SE of beta1 =    0.273
          z =      1.93
Prob > |z| =     0.0539
    
```

## (3c) Forest plots based on quality of studies (NOS)

| Study                                                           | Male  |          | Female |          | Log Risk Ratio with 95% CI       | Weight (%) |
|-----------------------------------------------------------------|-------|----------|--------|----------|----------------------------------|------------|
|                                                                 | Died  | Survived | Died   | Survived |                                  |            |
| <b>Good</b>                                                     |       |          |        |          |                                  |            |
| Welch, October 2020                                             | 2,177 | 972      | 1,938  | 624      | -0.09 [-0.12, -0.06]             | 18.49      |
| Apea, November 2020                                             | 859   | 351      | 601    | 185      | -0.07 [-0.13, -0.02]             | 11.09      |
| Dres, May 2021                                                  | 473   | 400      | 177    | 149      | -0.00 [-0.12, 0.11]              | 3.22       |
| Hendra, January 2021                                            | 60    | 24       | 52     | 12       | -0.13 [-0.31, 0.05]              | 1.46       |
| Heterogeneity: $\tau^2 = 0.00$ , $I^2 = 0.02\%$ , $H^2 = 1.00$  |       |          |        |          | Calculated RR = 1.08 [1.06-1.11] |            |
| Test of $\theta = \theta_j$ : $Q(3) = 2.38$ , $p = 0.50$        |       |          |        |          |                                  |            |
| <b>Fair</b>                                                     |       |          |        |          |                                  |            |
| Aw, October 2020                                                | 185   | 174      | 208    | 97       | -0.28 [-0.41, -0.15]             | 2.80       |
| Brill, June 2020                                                | 134   | 111      | 103    | 70       | -0.08 [-0.25, 0.08]              | 1.65       |
| Chinnadurai, October 2020                                       | 82    | 51       | 47     | 35       | 0.07 [-0.16, 0.30]               | 0.90       |
| Hoek, September 2020                                            | 14    | 4        | 4      | 1        | -0.03 [-0.53, 0.47]              | 0.19       |
| Knights, September 2020                                         | 38    | 20       | 31     | 14       | -0.05 [-0.32, 0.22]              | 0.65       |
| Kundi, December 2020                                            | 6,569 | 1,929    | 8,350  | 1,386    | -0.10 [-0.12, -0.09]             | 26.87      |
| Maguire, September 2020                                         | 91    | 33       | 81     | 19       | -0.10 [-0.24, 0.04]              | 2.25       |
| Marengoni, October 2020                                         | 73    | 27       | 50     | 15       | -0.05 [-0.23, 0.13]              | 1.46       |
| Tehrani, October 2020                                           | 108   | 42       | 77     | 28       | -0.02 [-0.17, 0.13]              | 1.97       |
| Fagard, November 2020                                           | 45    | 10       | 46     | 4        | -0.12 [-0.27, 0.03]              | 2.06       |
| Aliberti, February 2021                                         | 653   | 408      | 511    | 258      | -0.08 [-0.15, -0.01]             | 7.66       |
| Heterogeneity: $\tau^2 = 0.00$ , $I^2 = 0.00\%$ , $H^2 = 1.00$  |       |          |        |          | Calculated RR = 1.08 [1.06-1.11] |            |
| Test of $\theta = \theta_j$ : $Q(10) = 12.20$ , $p = 0.27$      |       |          |        |          |                                  |            |
| <b>Poor</b>                                                     |       |          |        |          |                                  |            |
| Baker, May 2020                                                 | 113   | 46       | 97     | 35       | -0.03 [-0.18, 0.11]              | 2.24       |
| Bellelli, May 2020                                              | 41    | 31       | 22     | 11       | -0.16 [-0.47, 0.16]              | 0.49       |
| Davis, October 2020                                             | 87    | 61       | 40     | 34       | 0.08 [-0.17, 0.33]               | 0.77       |
| De Smet, July 2020                                              | 25    | 8        | 37     | 11       | -0.02 [-0.26, 0.23]              | 0.78       |
| Hewitt, August 2020                                             | 648   | 255      | 491    | 170      | -0.03 [-0.10, 0.03]              | 9.24       |
| Koduri, August 2020                                             | 172   | 128      | 135    | 65       | -0.16 [-0.30, -0.03]             | 2.41       |
| Steinmeyer, September 2020                                      | 36    | 6        | 41     | 11       | 0.08 [-0.10, 0.27]               | 1.34       |
| Heterogeneity: $\tau^2 = 0.00$ , $I^2 = 0.00\%$ , $H^2 = 1.00$  |       |          |        |          | Calculated RR = 1.08 [1.06-1.11] |            |
| Test of $\theta = \theta_j$ : $Q(6) = 6.34$ , $p = 0.39$        |       |          |        |          |                                  |            |
| <b>Overall</b>                                                  |       |          |        |          |                                  |            |
| Heterogeneity: $\tau^2 = 0.00$ , $I^2 = 23.02\%$ , $H^2 = 1.30$ |       |          |        |          | Calculated RR = 1.08 [1.06-1.11] |            |
| Test of $\theta = \theta_j$ : $Q(21) = 28.31$ , $p = 0.13$      |       |          |        |          |                                  |            |
| Test of group differences: $Q_b(2) = 7.39$ , $p = 0.02$         |       |          |        |          |                                  |            |

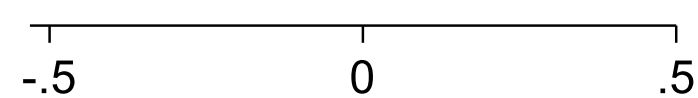

### (3d) Age-stratification

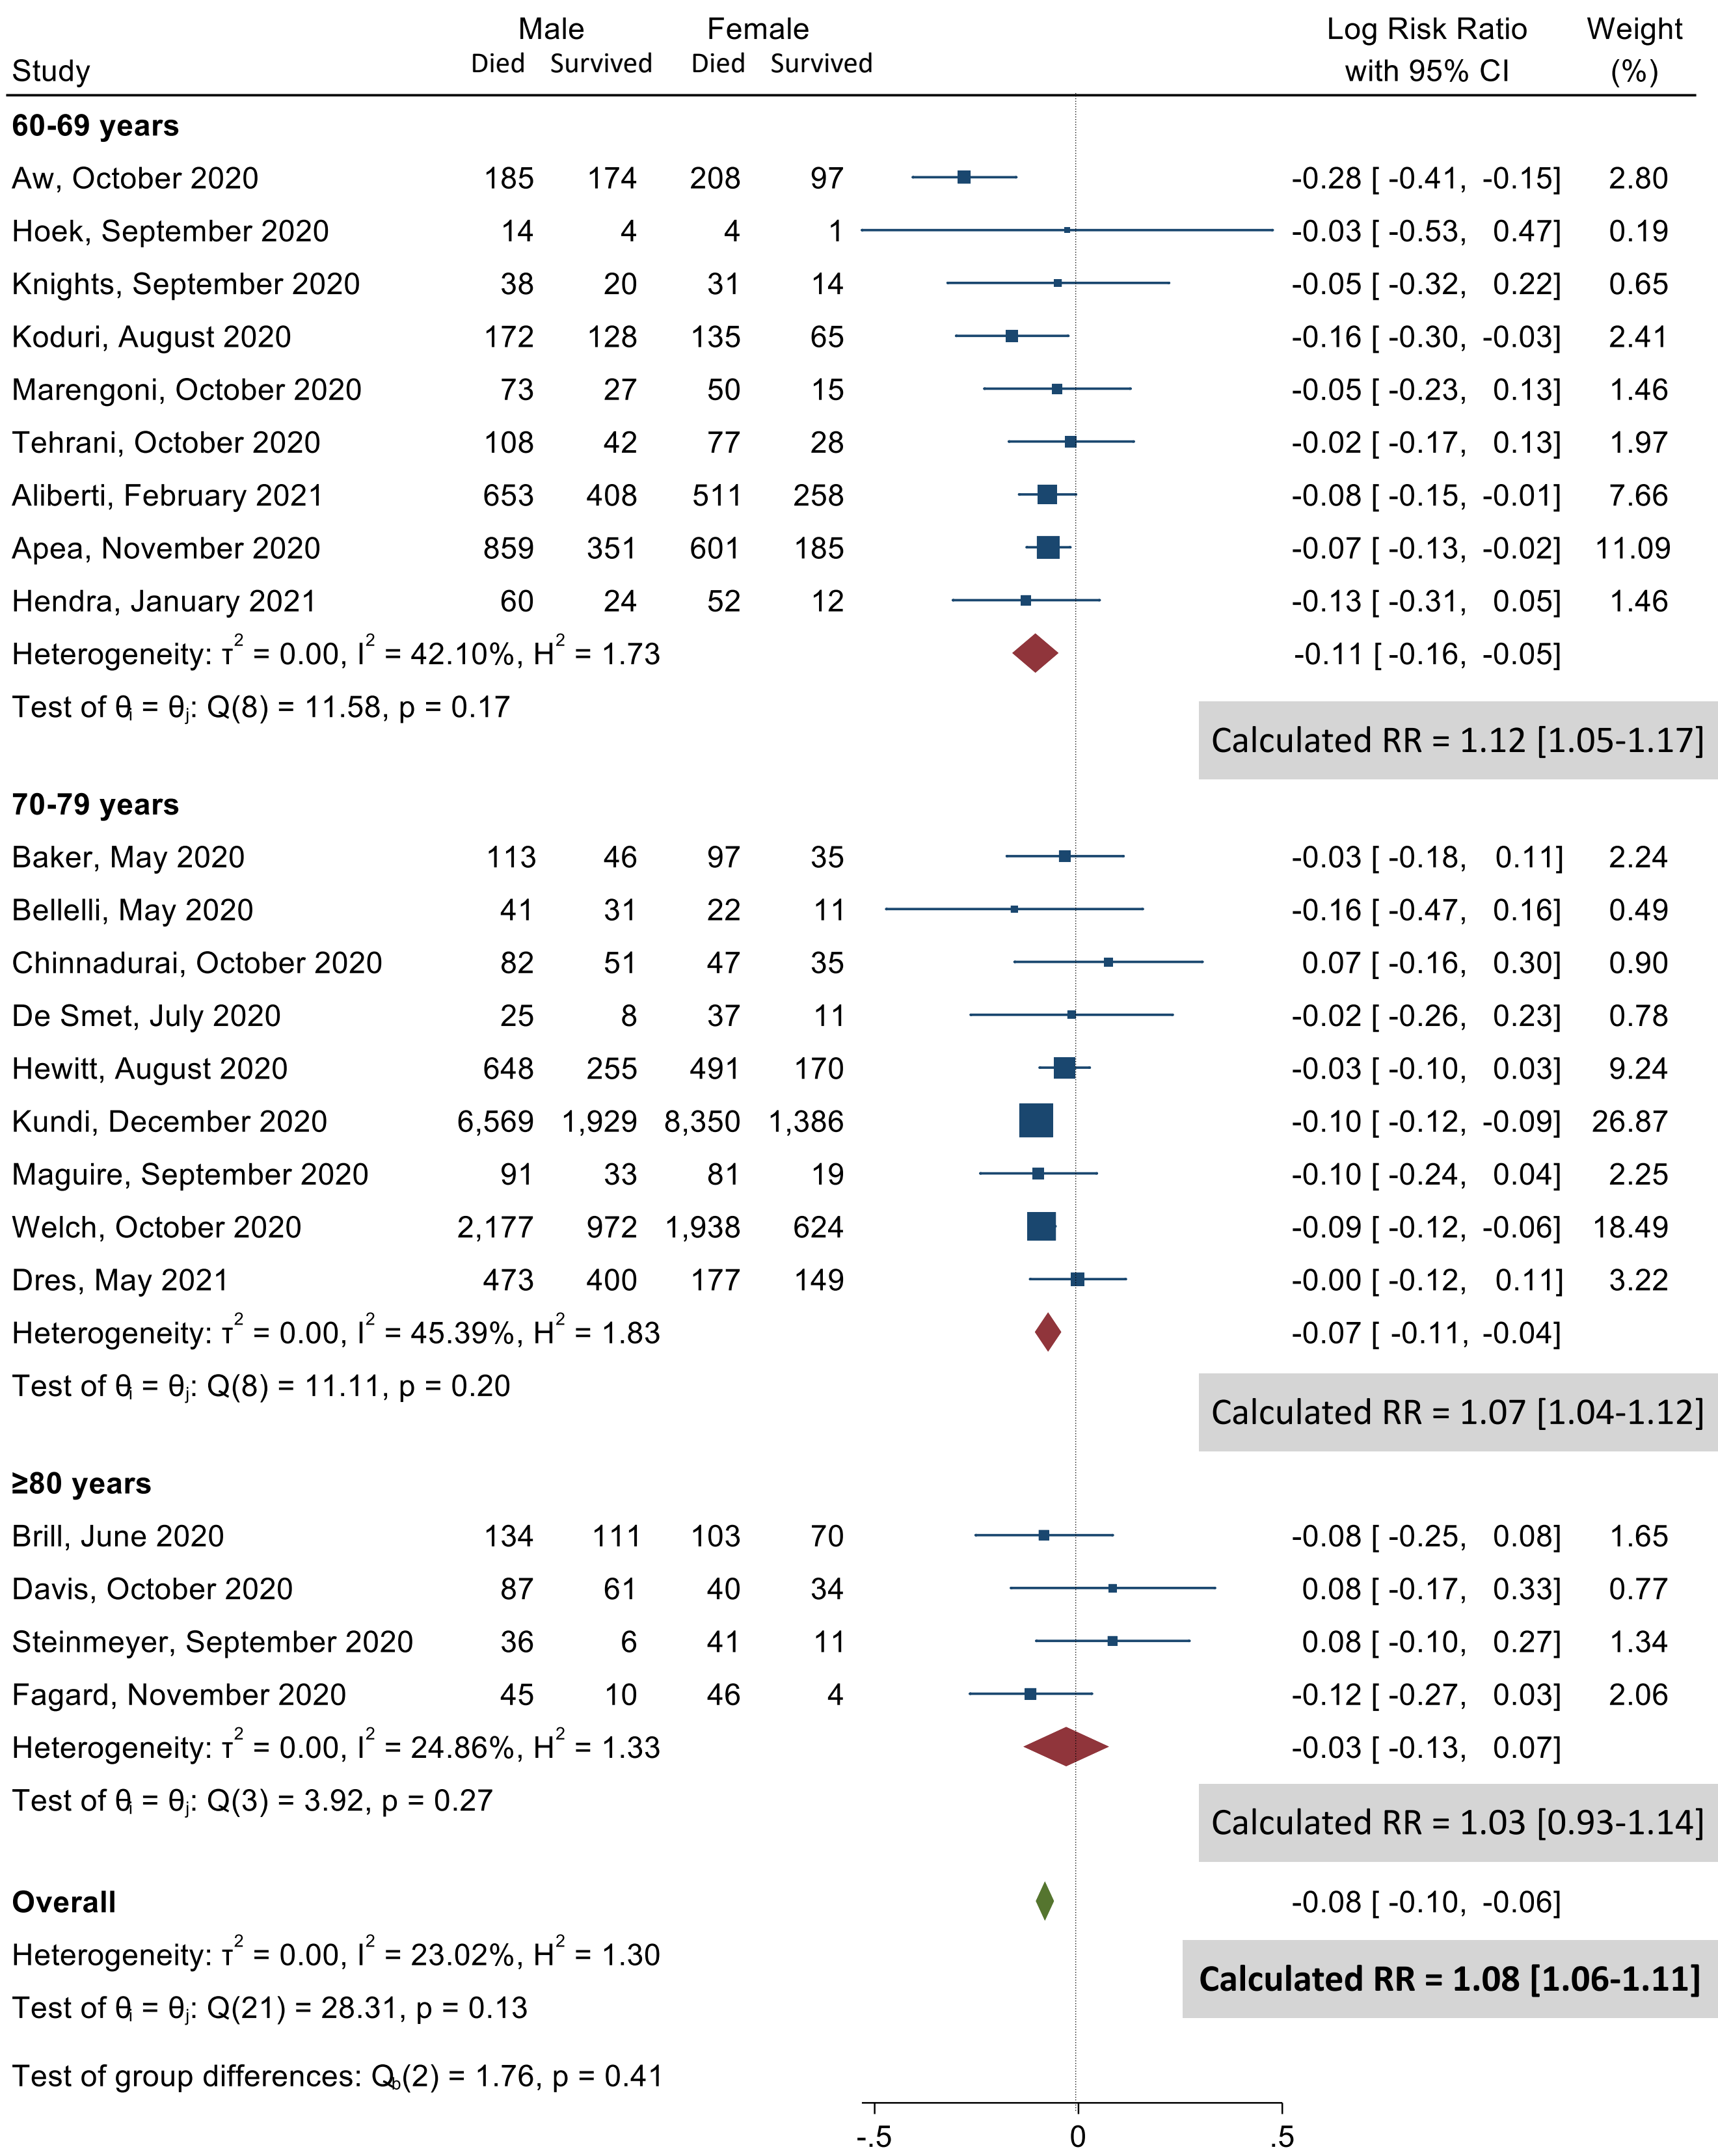

Random-effects REML model

# Supplementary Figure 4: Frail vs. non-frail patients

(5a) Funnel plot

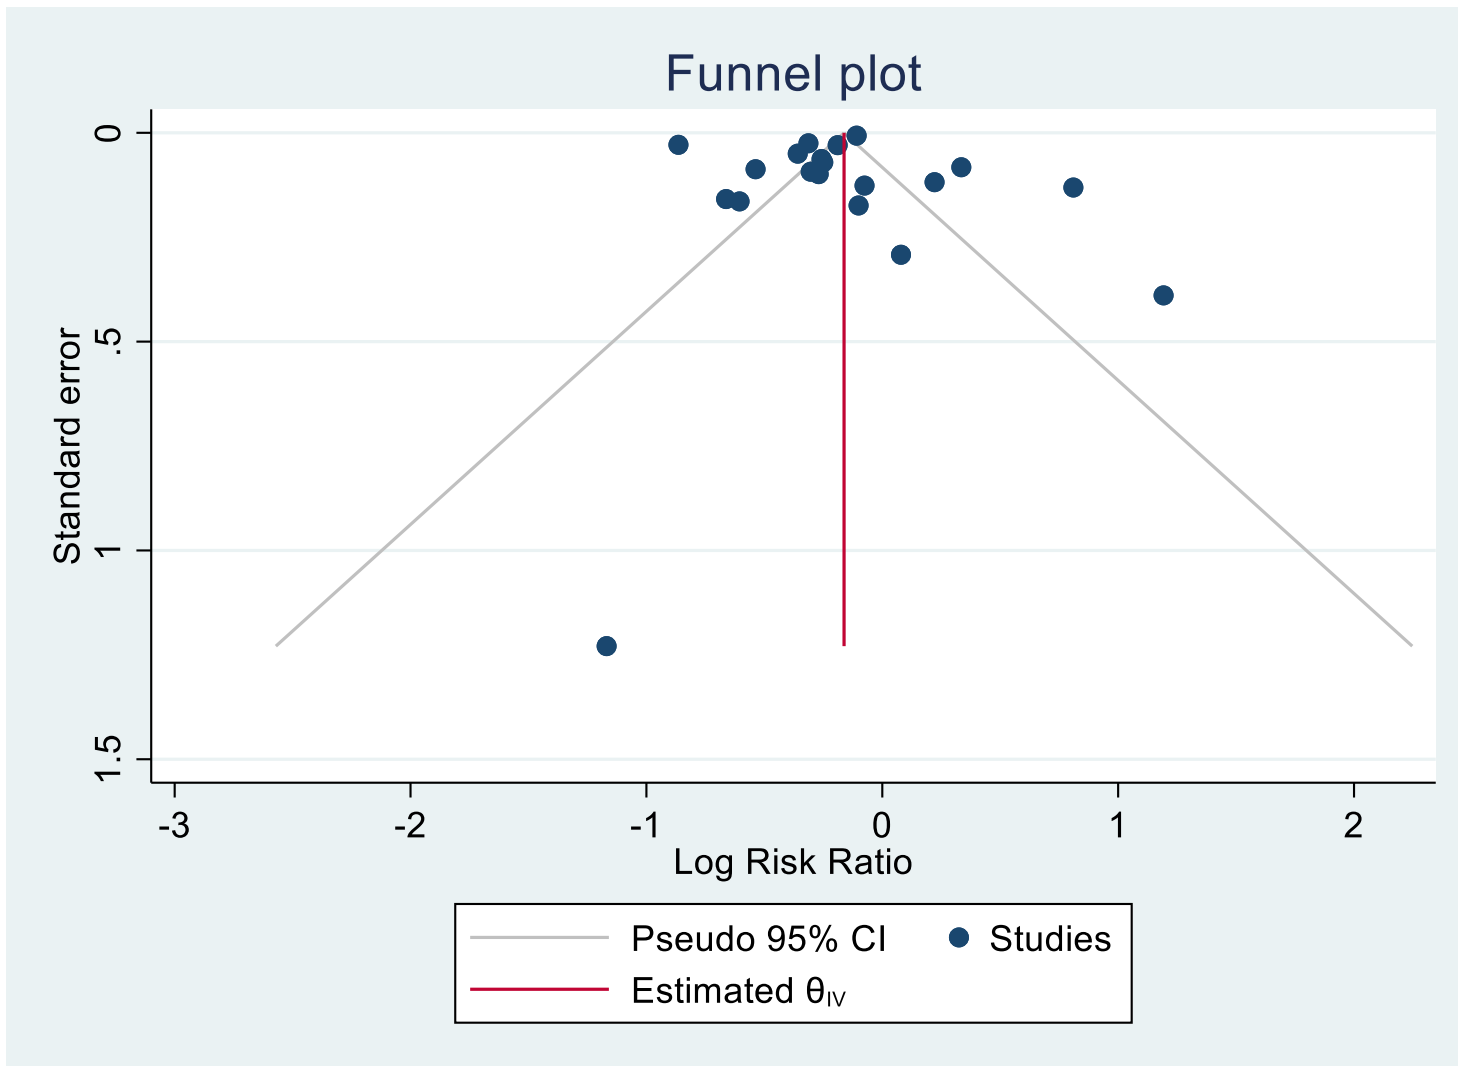

(5b) Egger's Test

```

. . meta bias, egger

Effect-size label:  Log Risk Ratio
Effect size:       _meta_es
Std. Err.:        _meta_se

Regression-based Egger test for small-study effects
Random-effects model
Method: REML

H0: beta1 = 0; no small-study effects
      beta1 =      0.82
SE of beta1 =    0.828
          z =      0.98
Prob > |z| =     0.3247
    
```

(5c) Forest plots based on quality of studies (NOS)

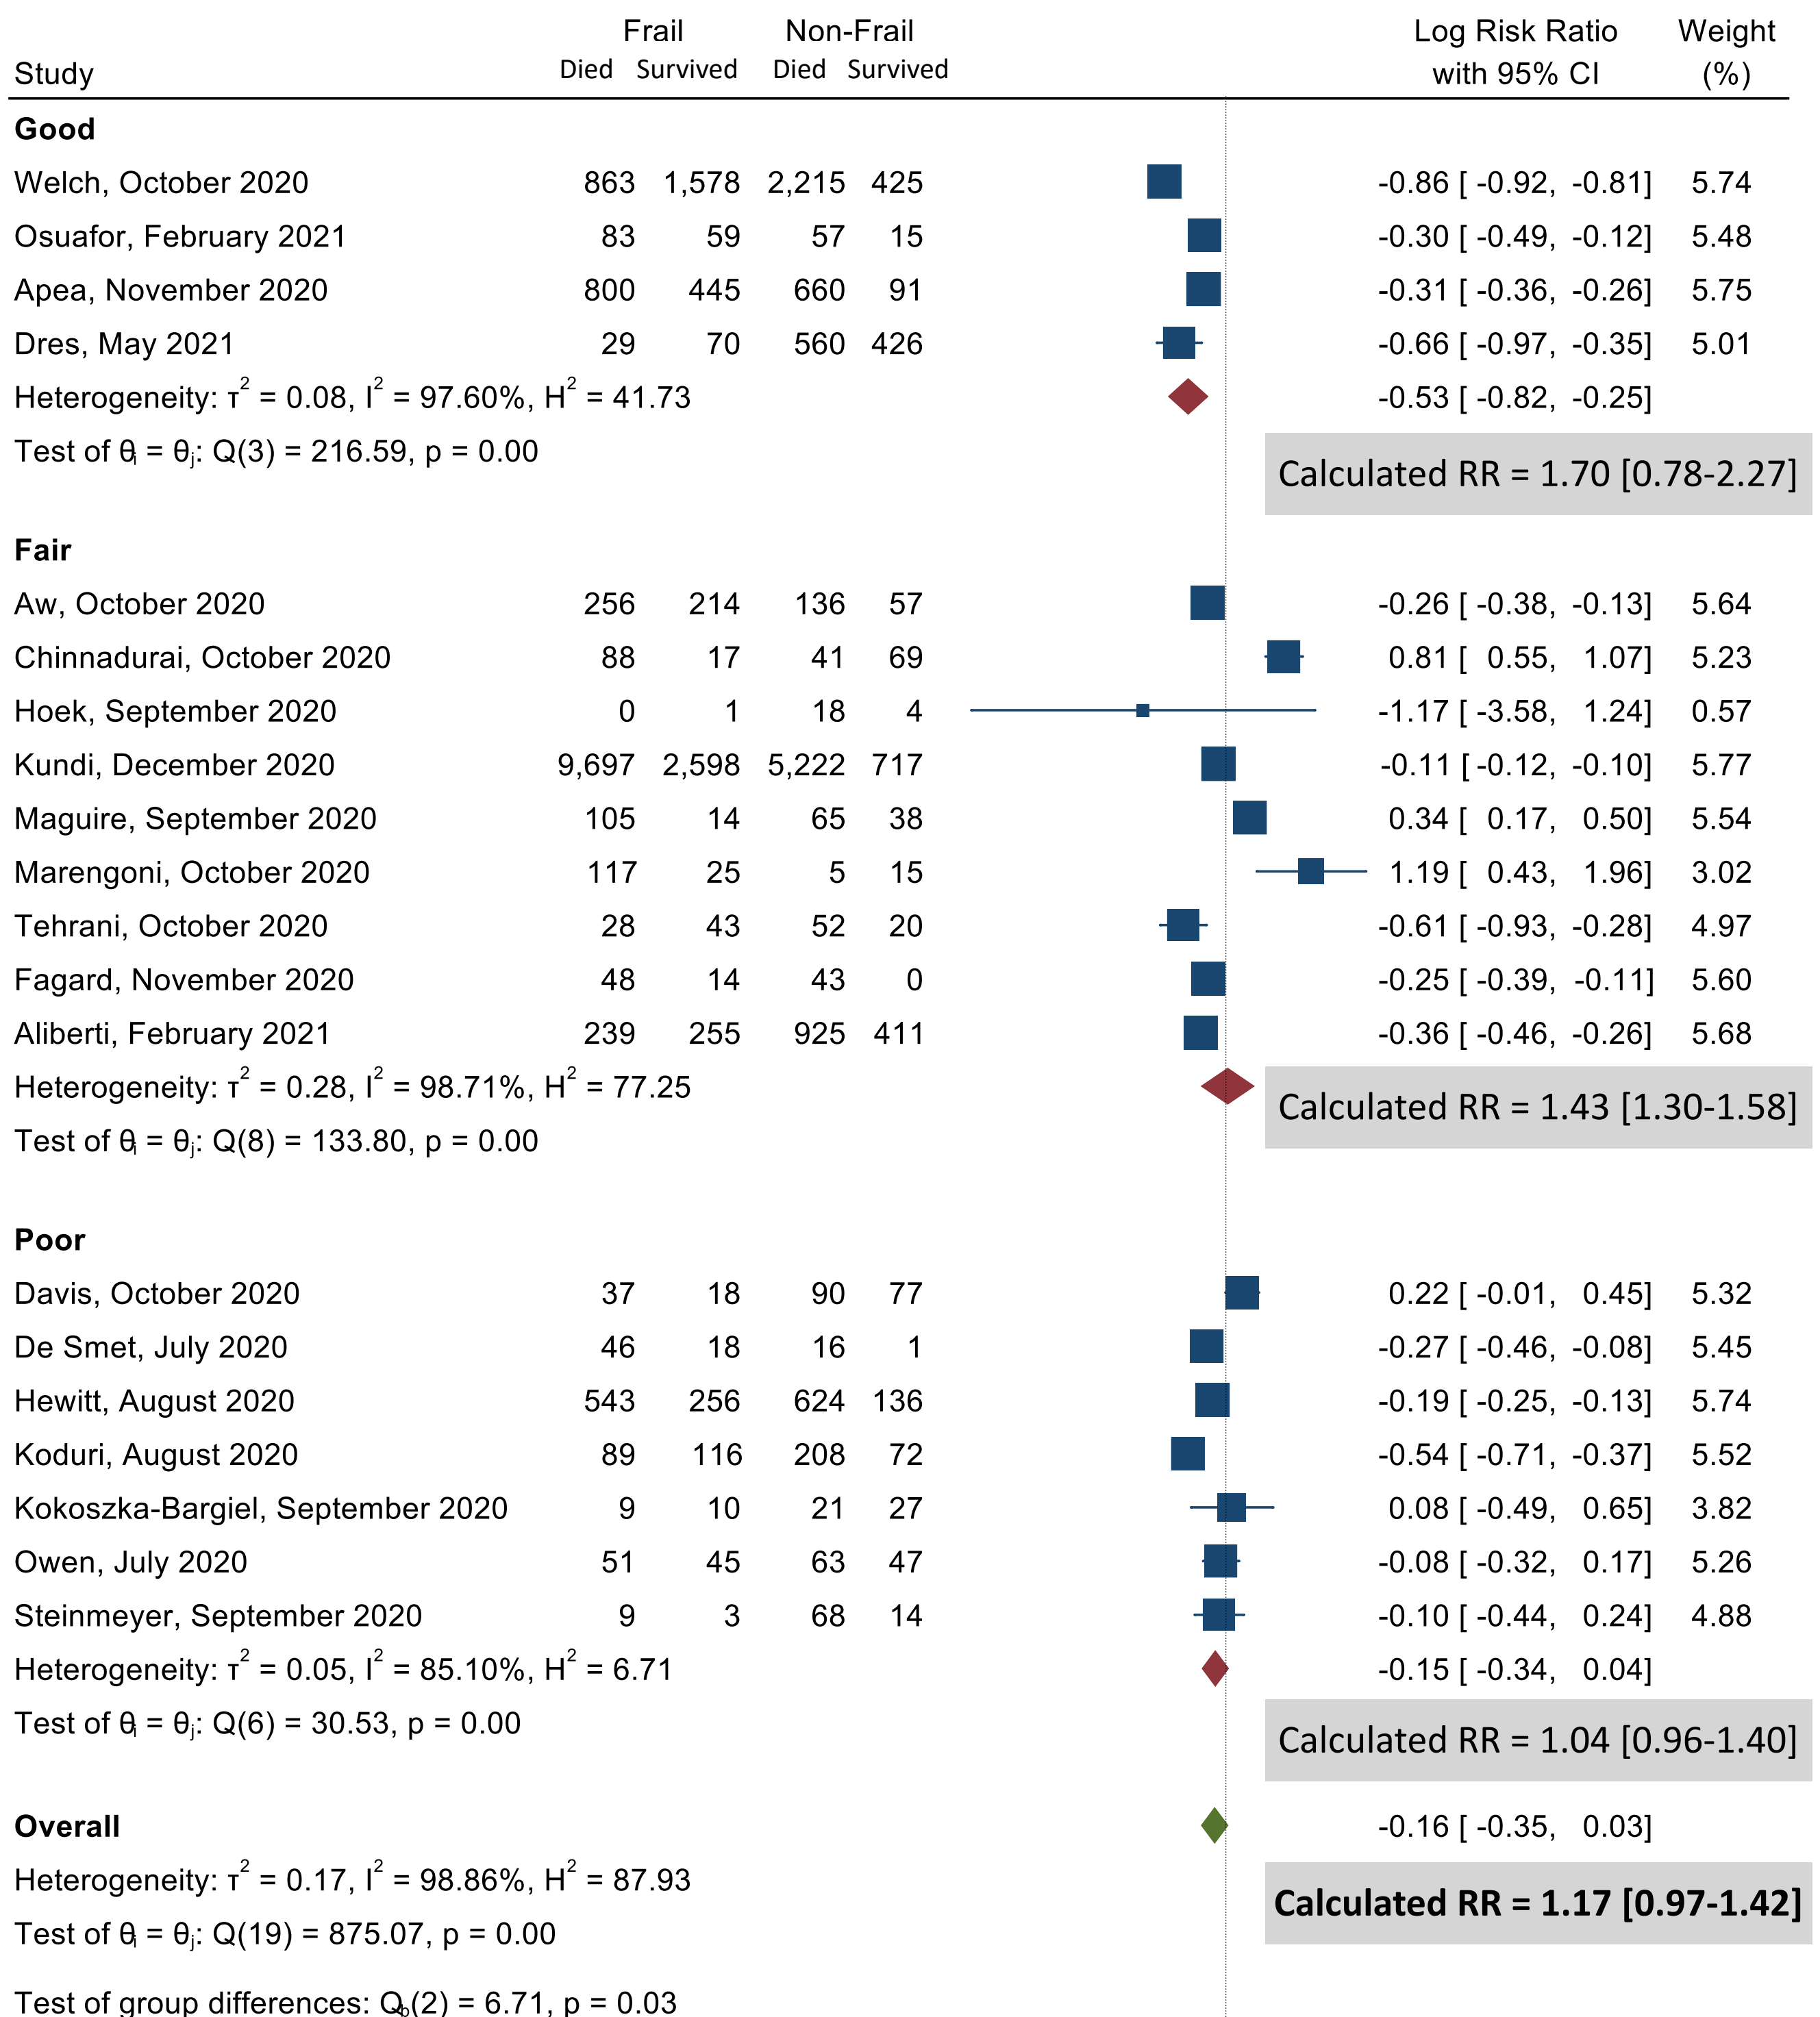

# Supplementary Figure 5: ICU Admission: survivor vs. non-survivor analysis.

(5a) Funnel plot

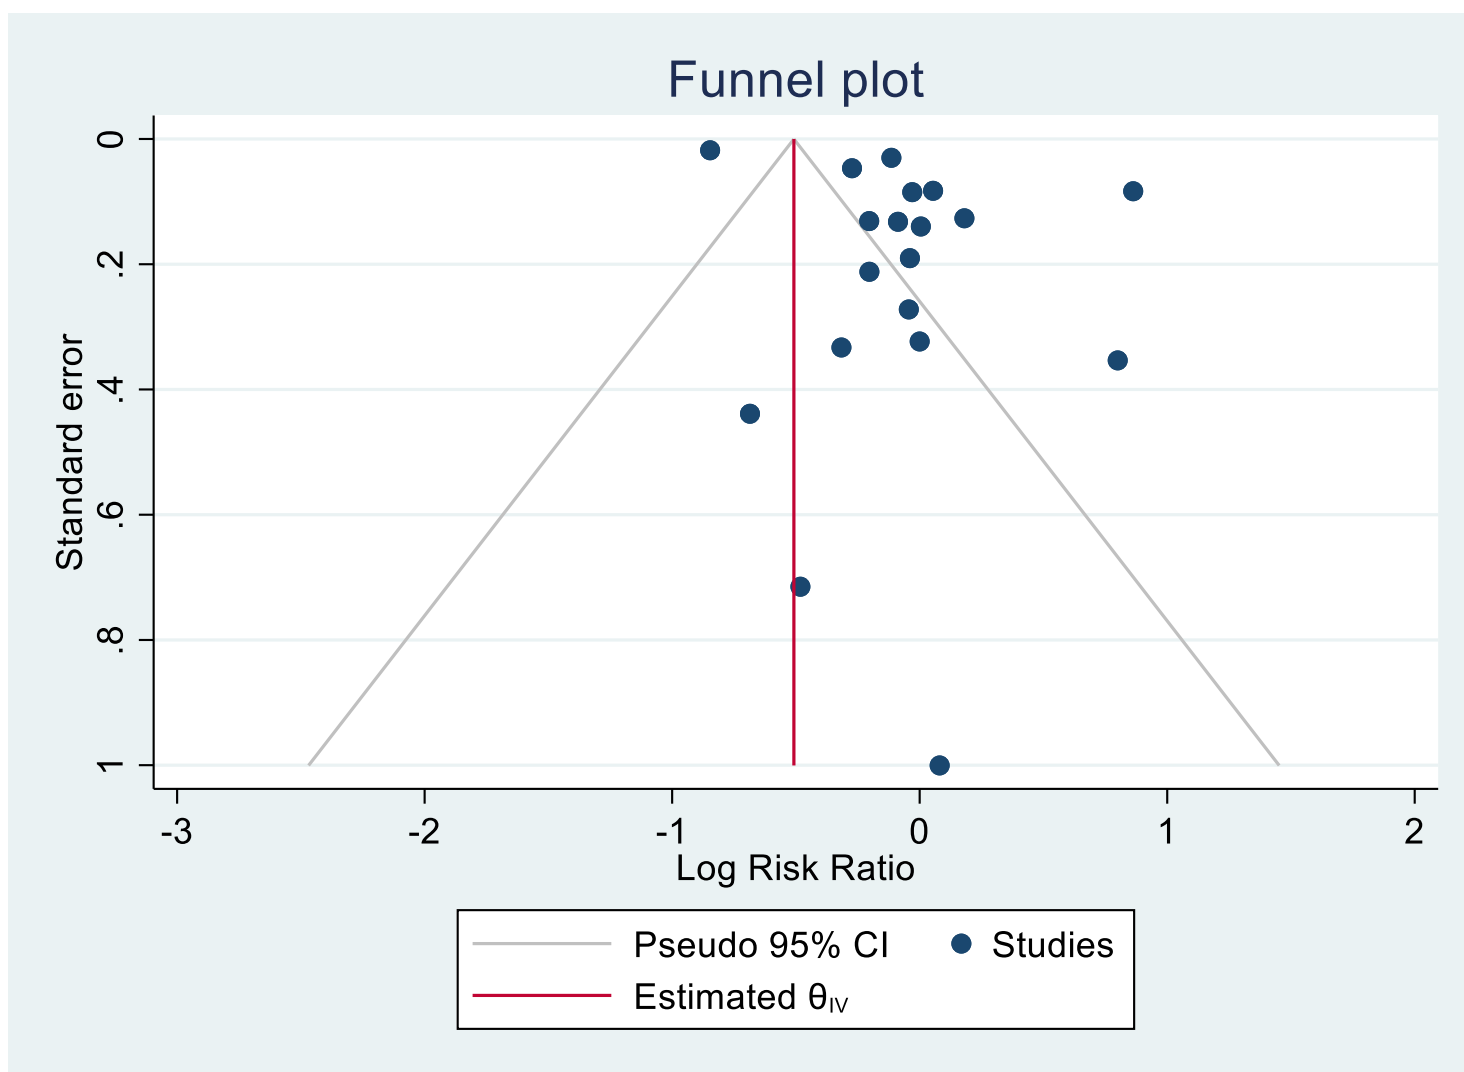

(5b) Egger's Test

```

. . meta bias, egger

Effect-size label:  Log Risk Ratio
Effect size:       _meta_es
Std. Err.:        _meta_se

Regression-based Egger test for small-study effects
Random-effects model
Method: REML

H0: beta1 = 0; no small-study effects
      beta1 =      0.05
SE of beta1 =    0.669
          z =      0.07
Prob > |z| =     0.9450
    
```

(5c) Forest plots based on quality of studies

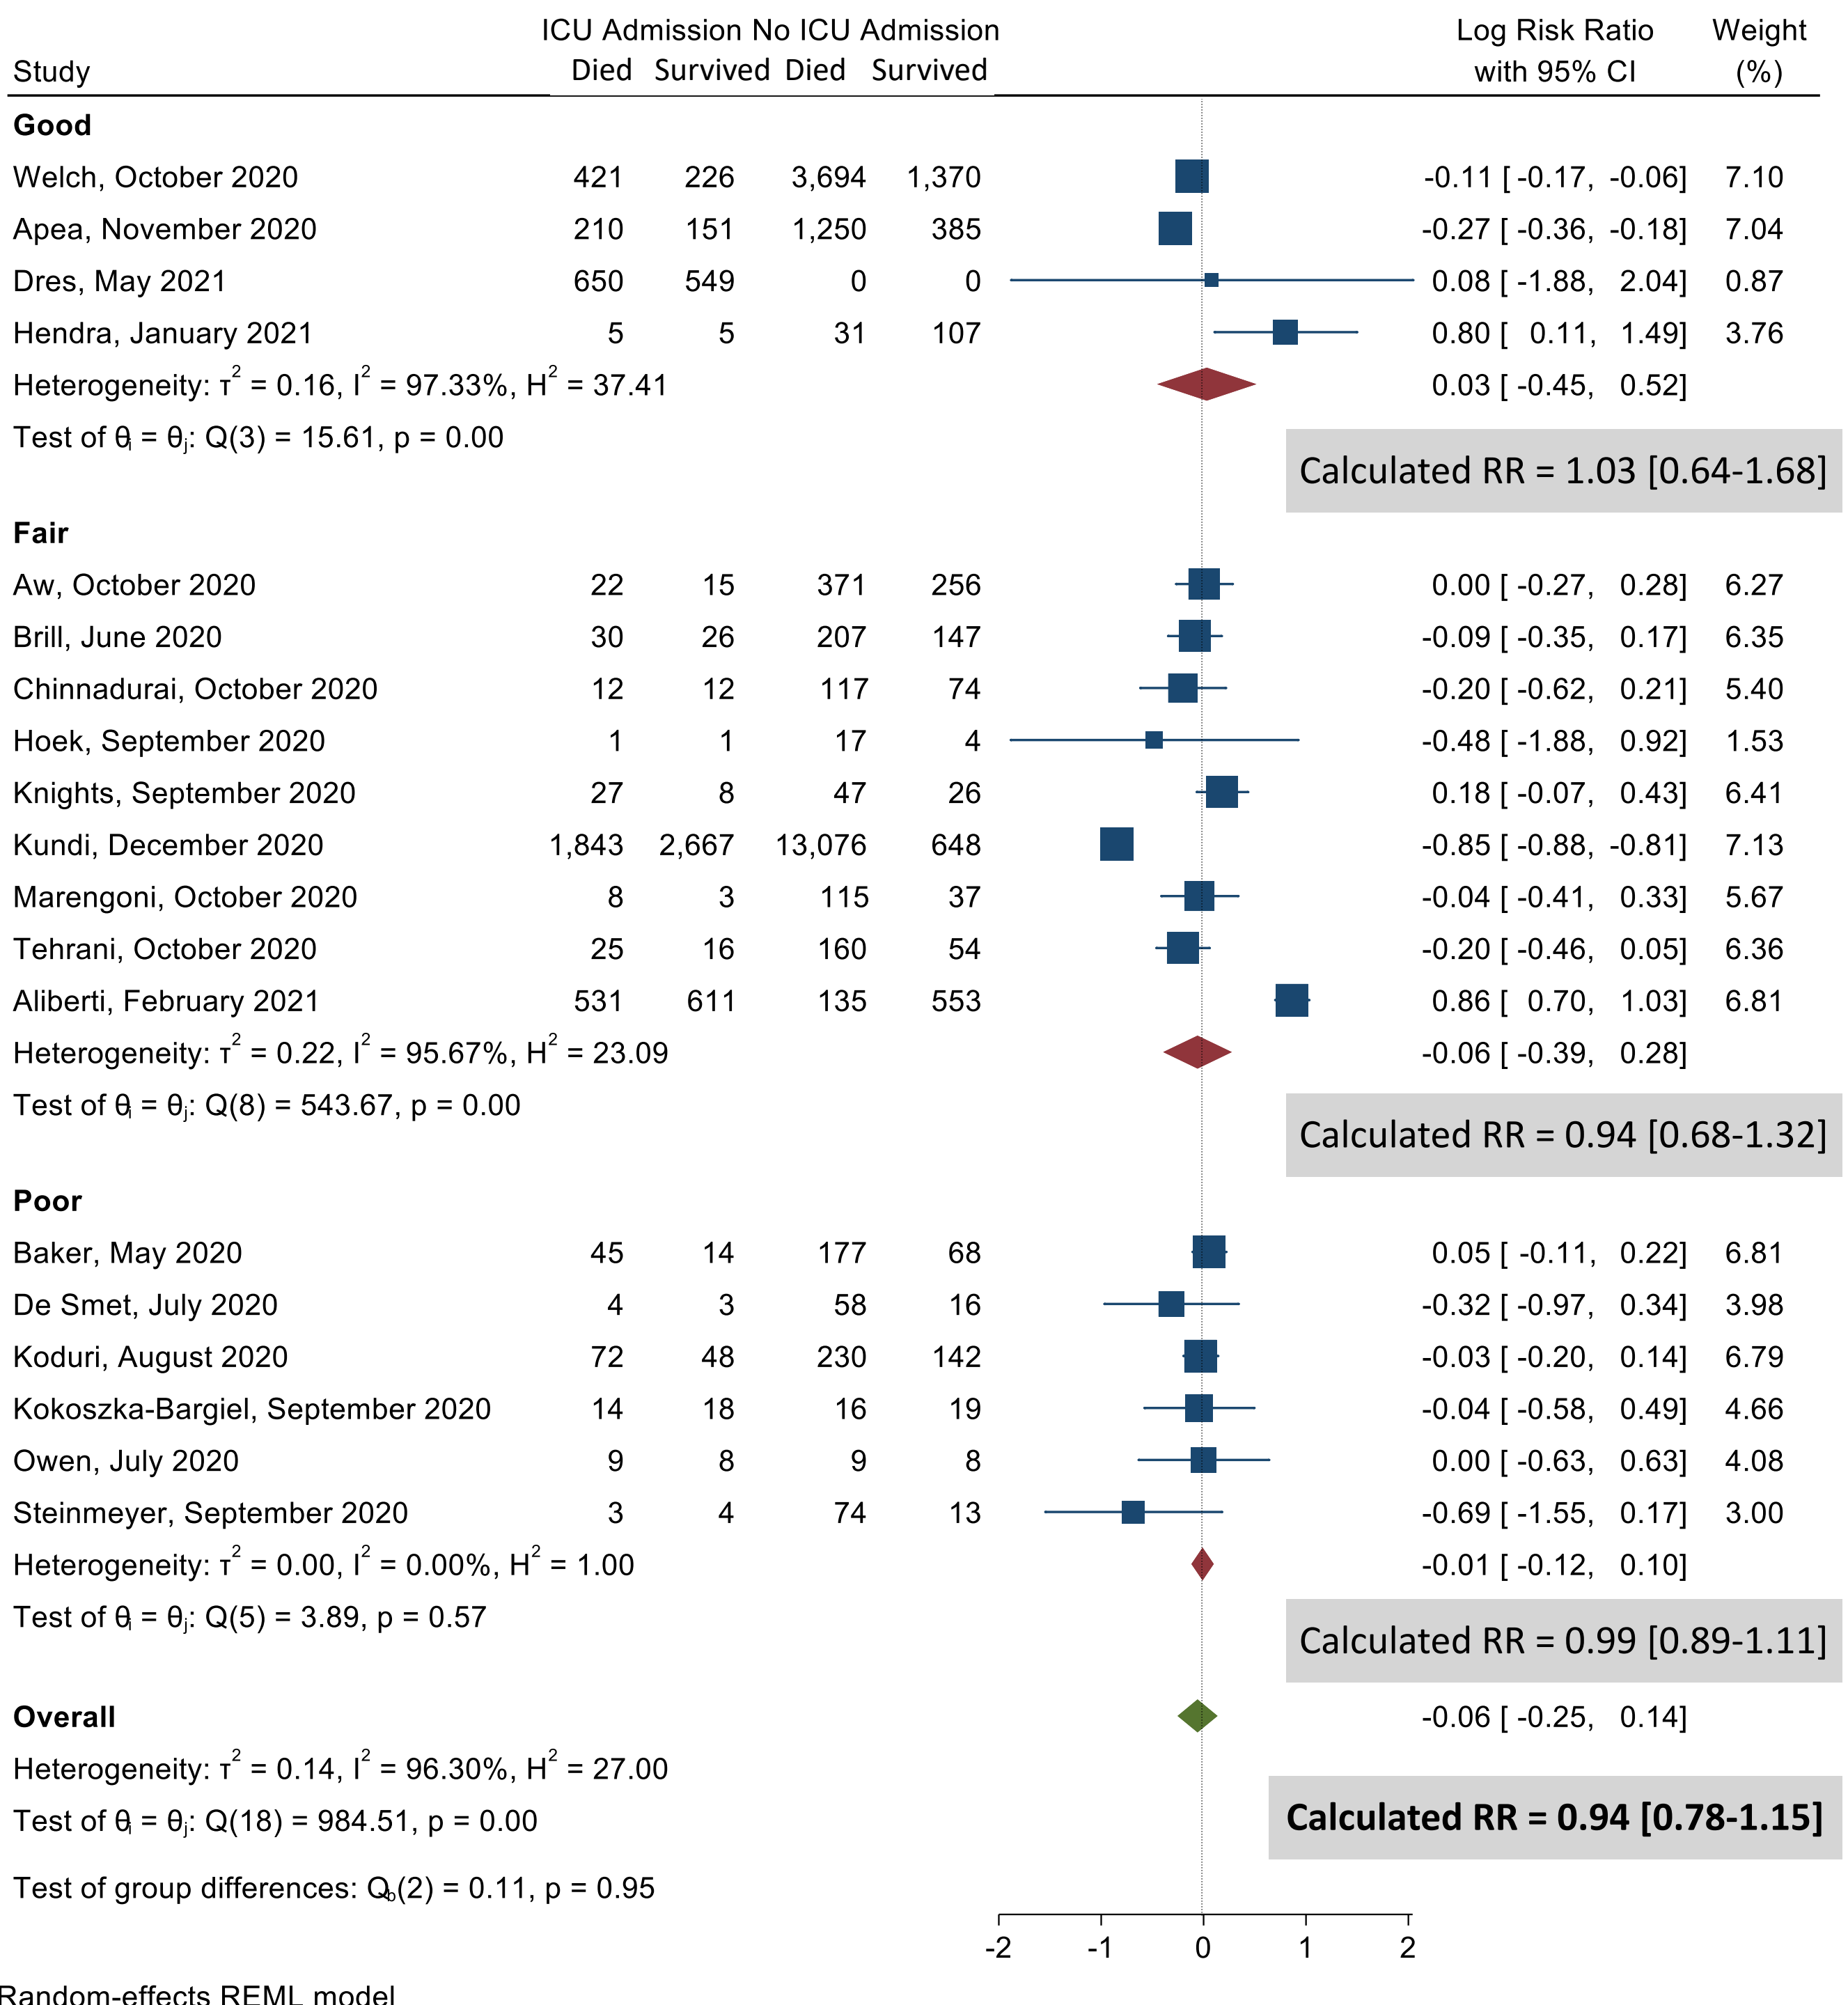

# Supplementary Figure 6: Invasive Mechanical Ventilation (IMV):

(6a) Funnel plot

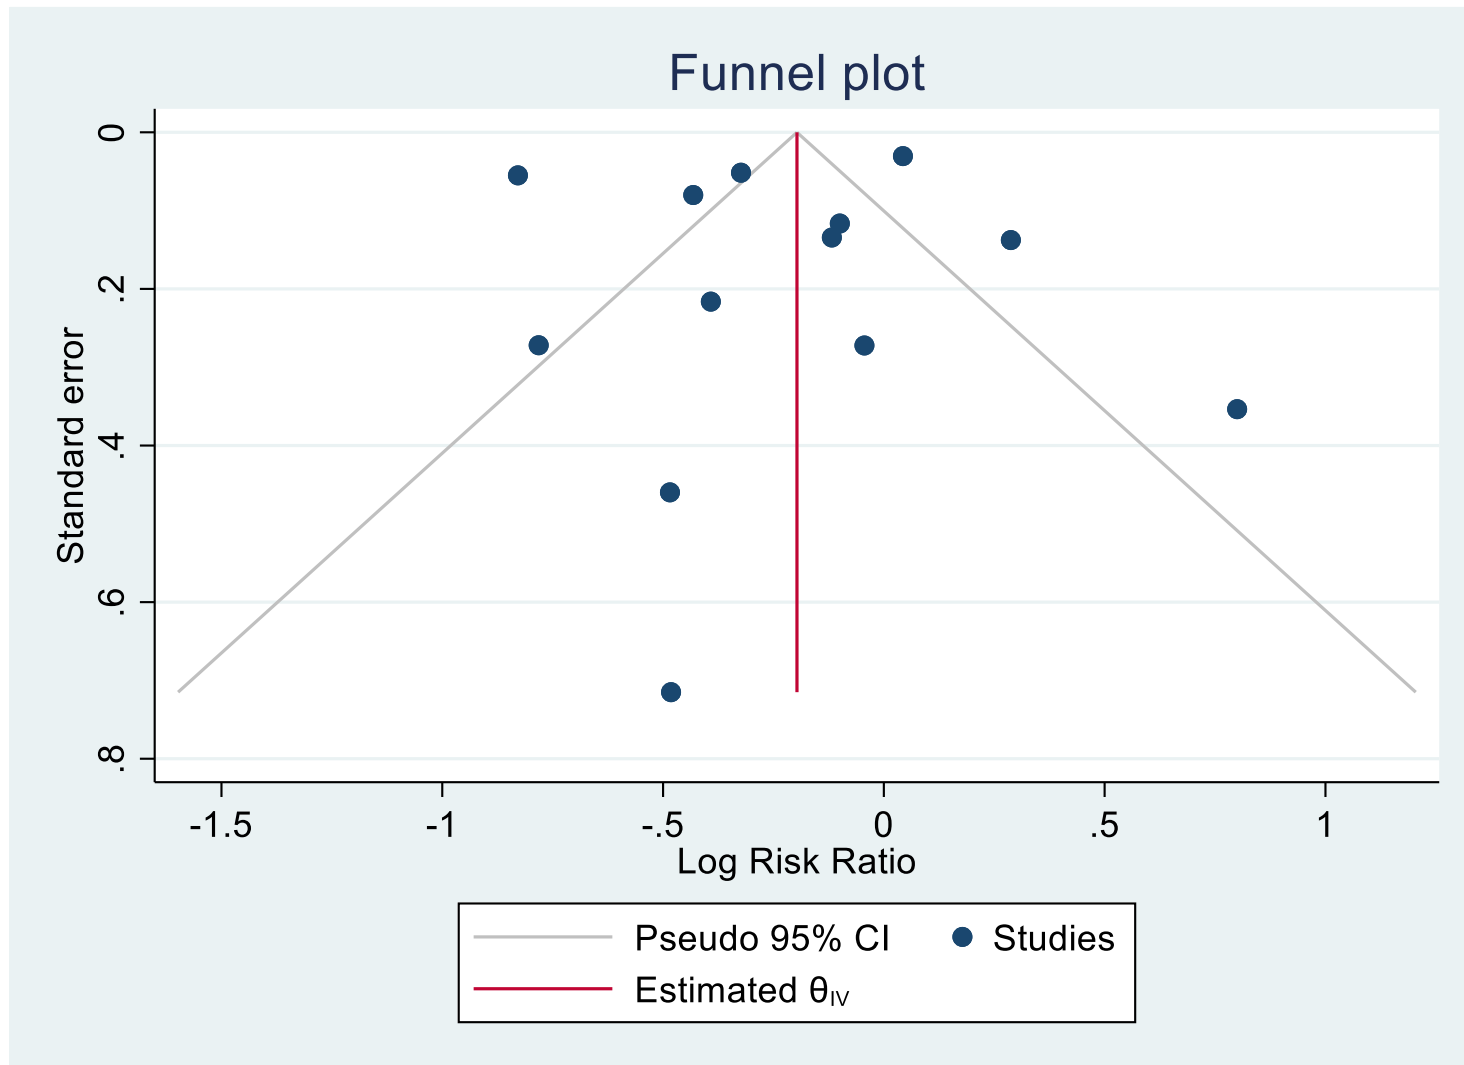

(6b) Egger's Test

```

. . meta bias, egger

Effect-size label:  Log Risk Ratio
Effect size:       _meta_es
Std. Err.:        _meta_se

Regression-based Egger test for small-study effects
Random-effects model
Method: REML

H0: beta1 = 0; no small-study effects
      beta1 =      0.24
SE of beta1 =    0.853
          z =      0.29
Prob > |z| =     0.7756
    
```

(6c) Forest plots based on quality of studies

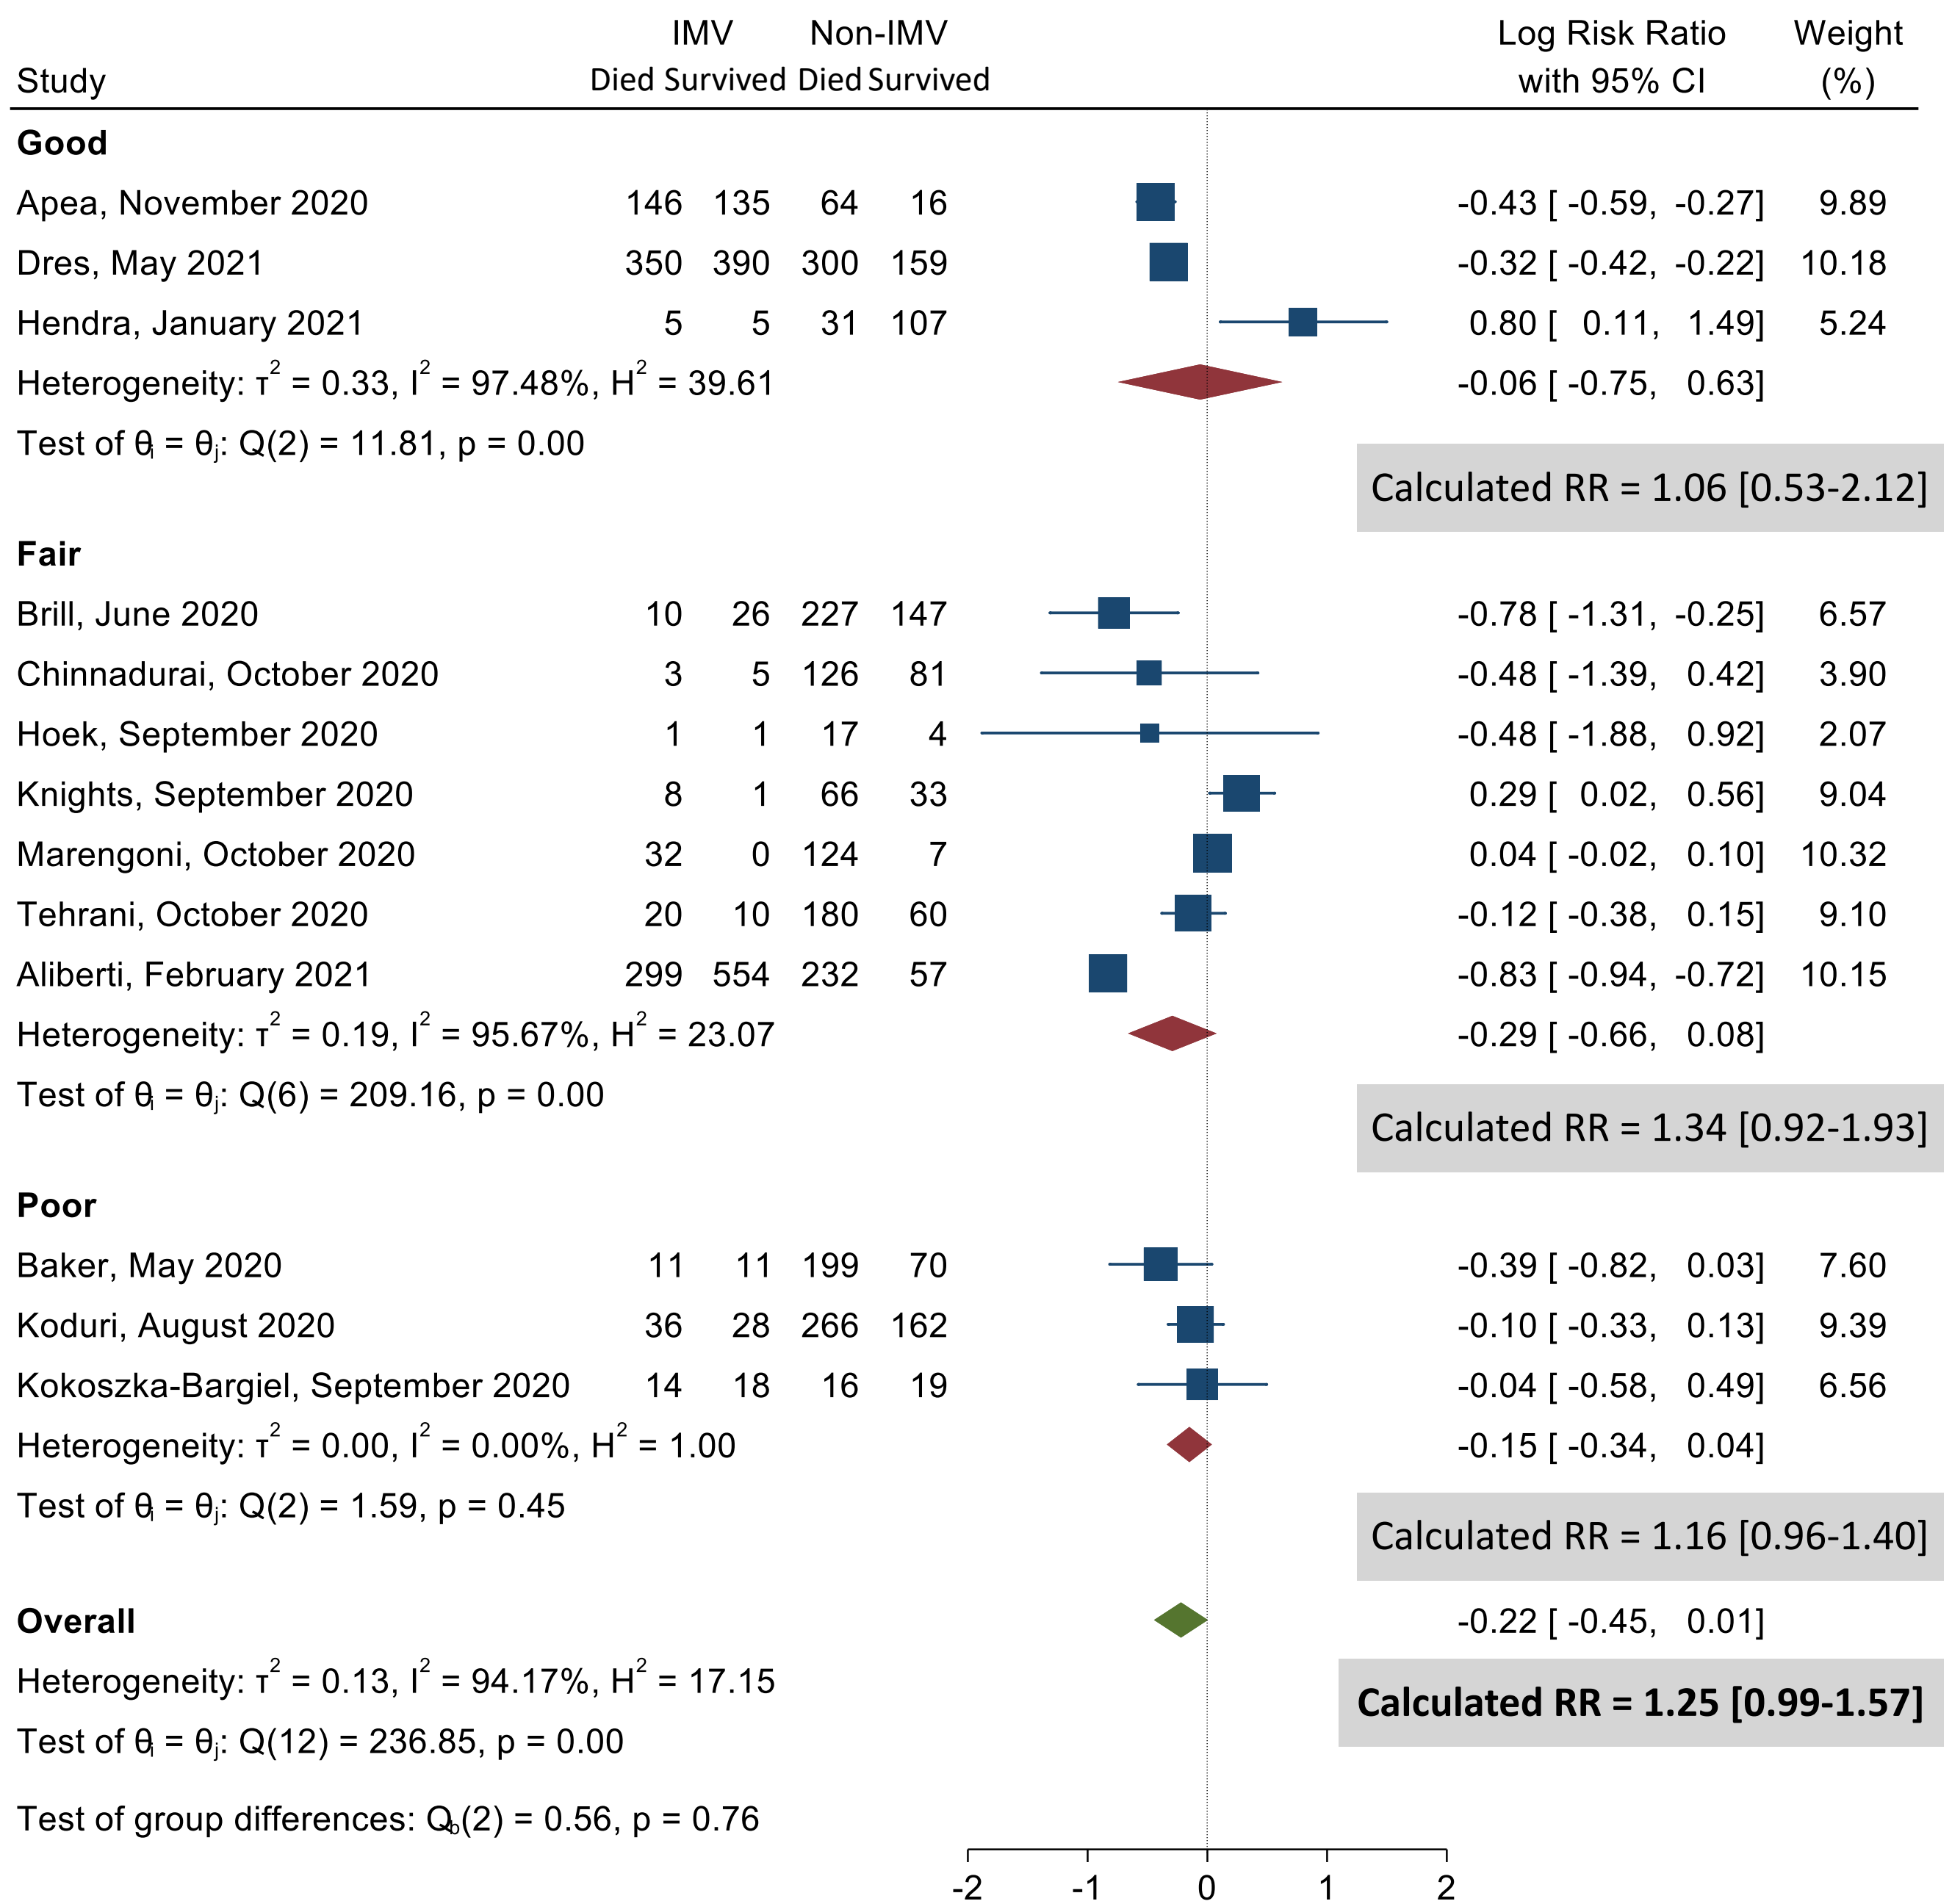

# Supplementary Figure 7: Post Hoc Analysis CFS vs other frailty measures.

## (7a) Frail vs. non-frail

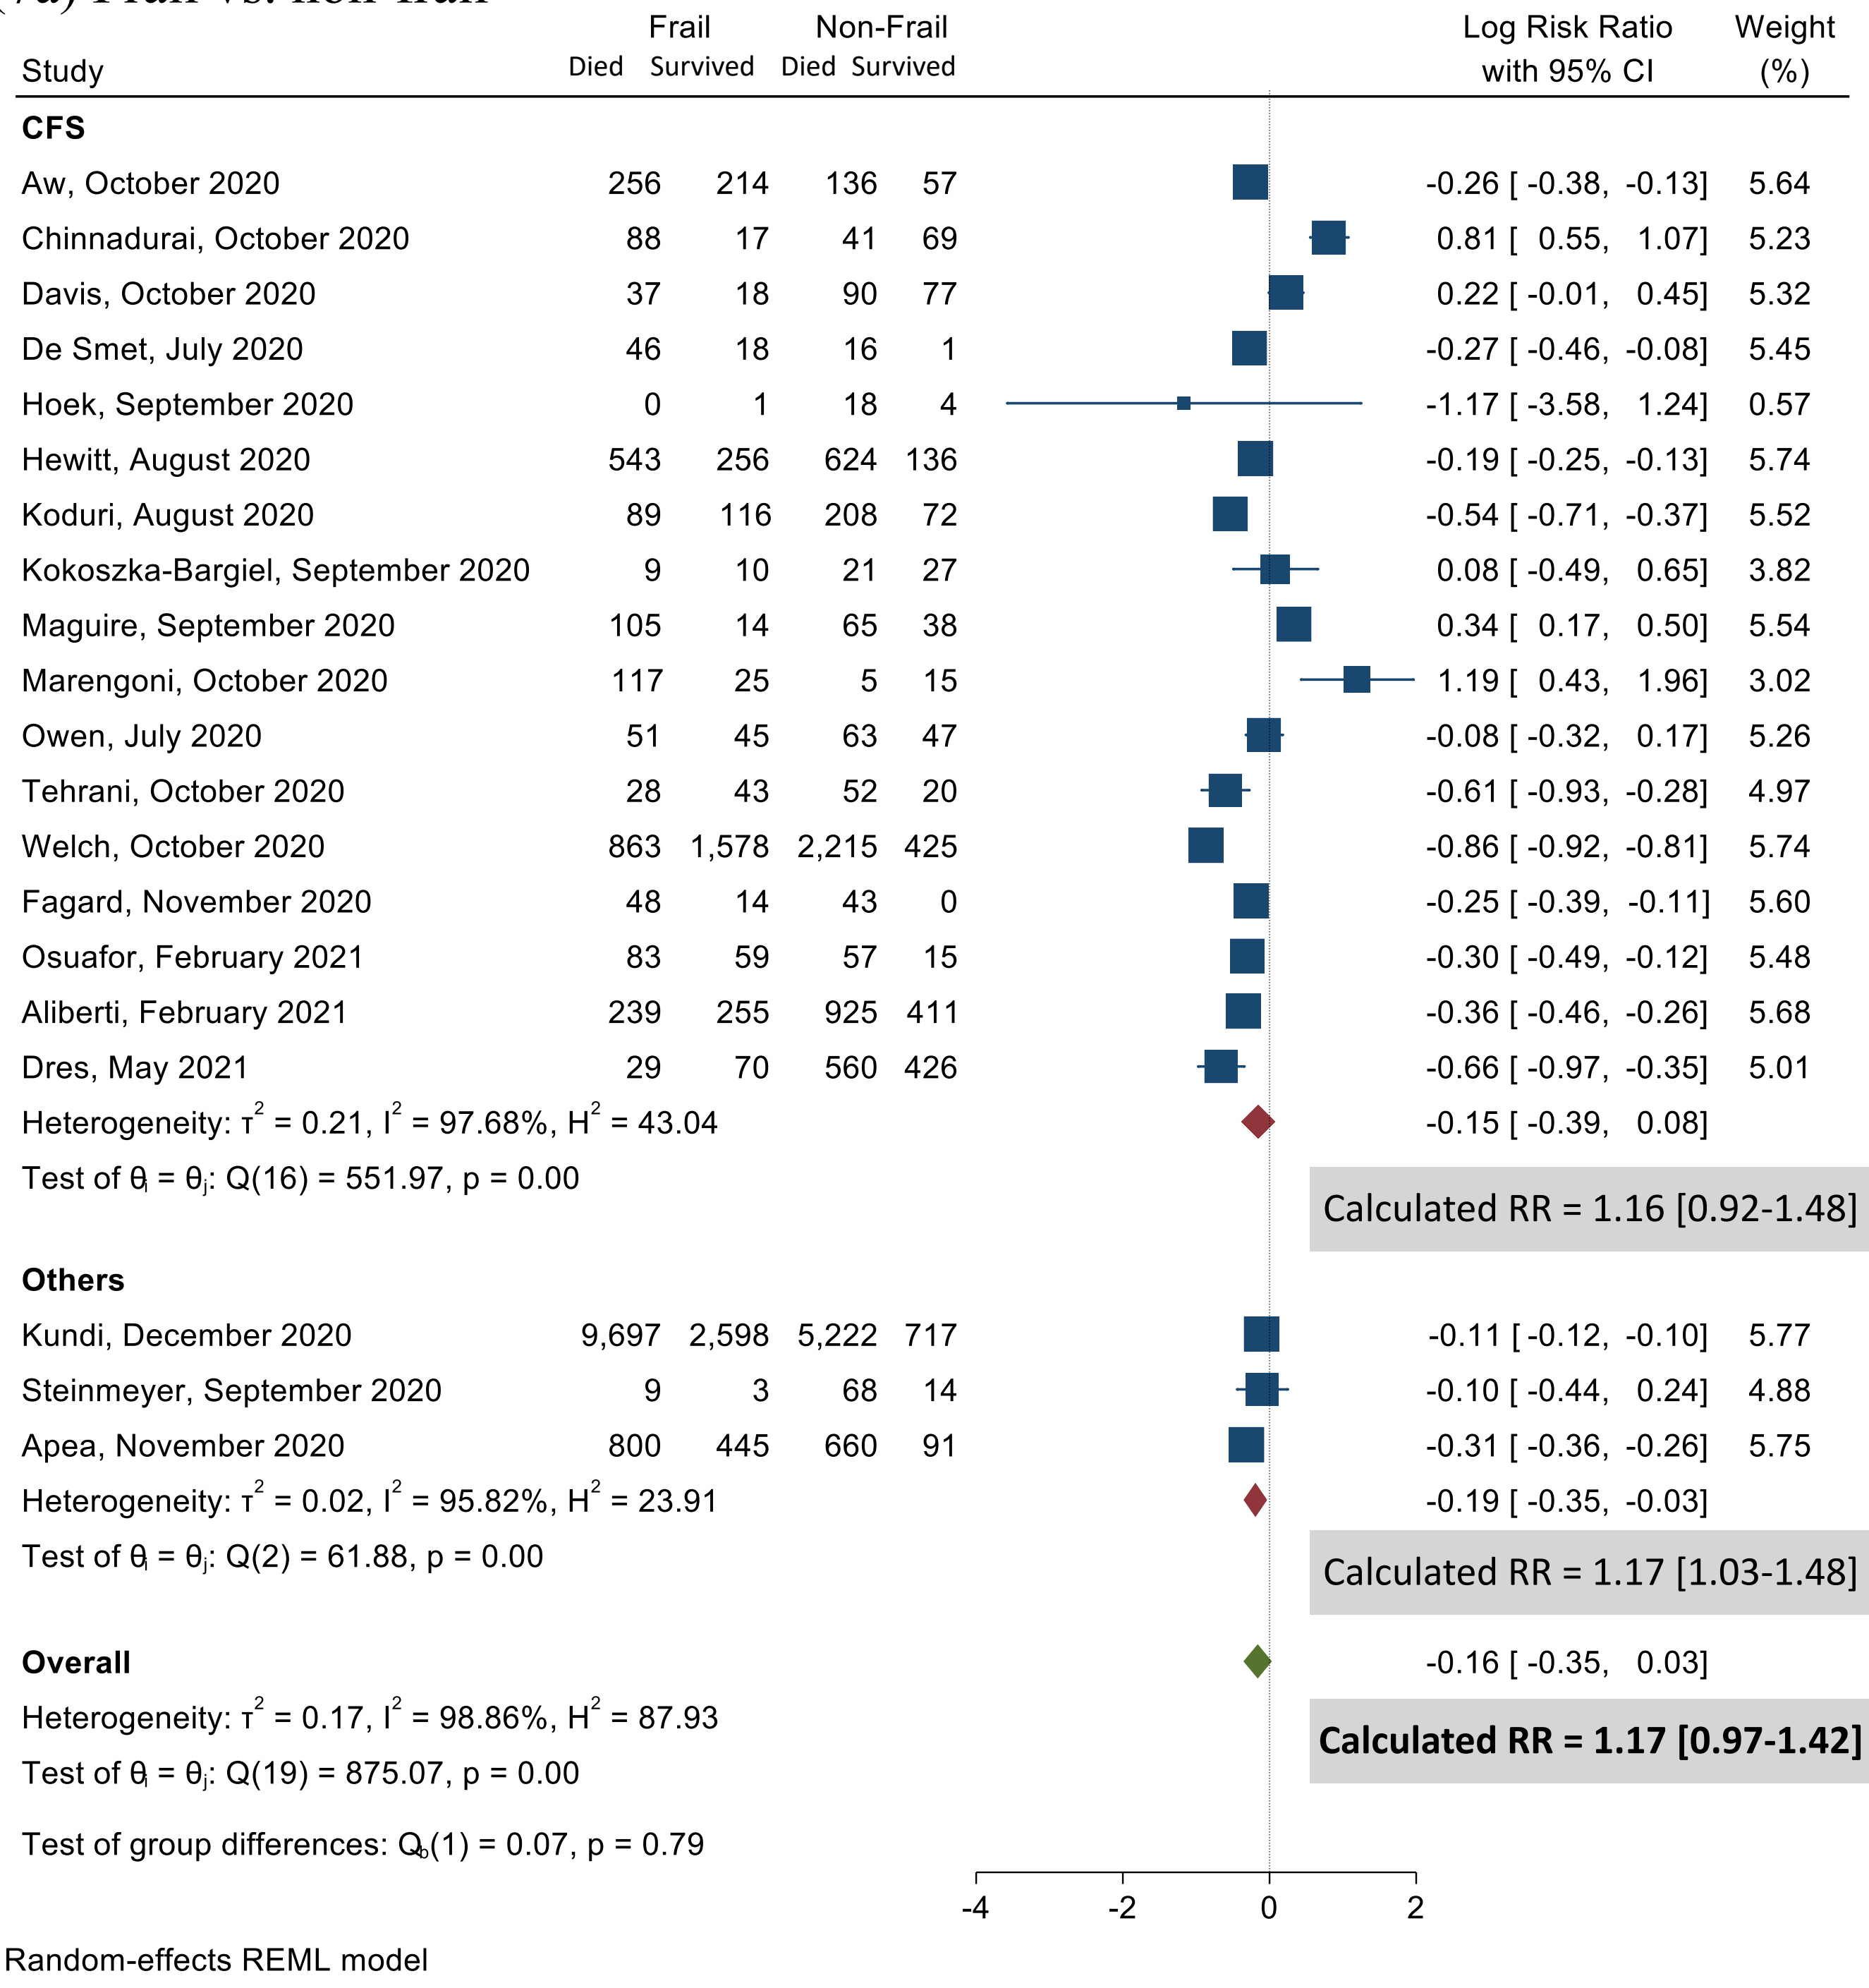

Random-effects REML model



# Supplementary Figure 7: Post Hoc Analysis CFS vs other frailty measures.

## (7b) Male vs. female

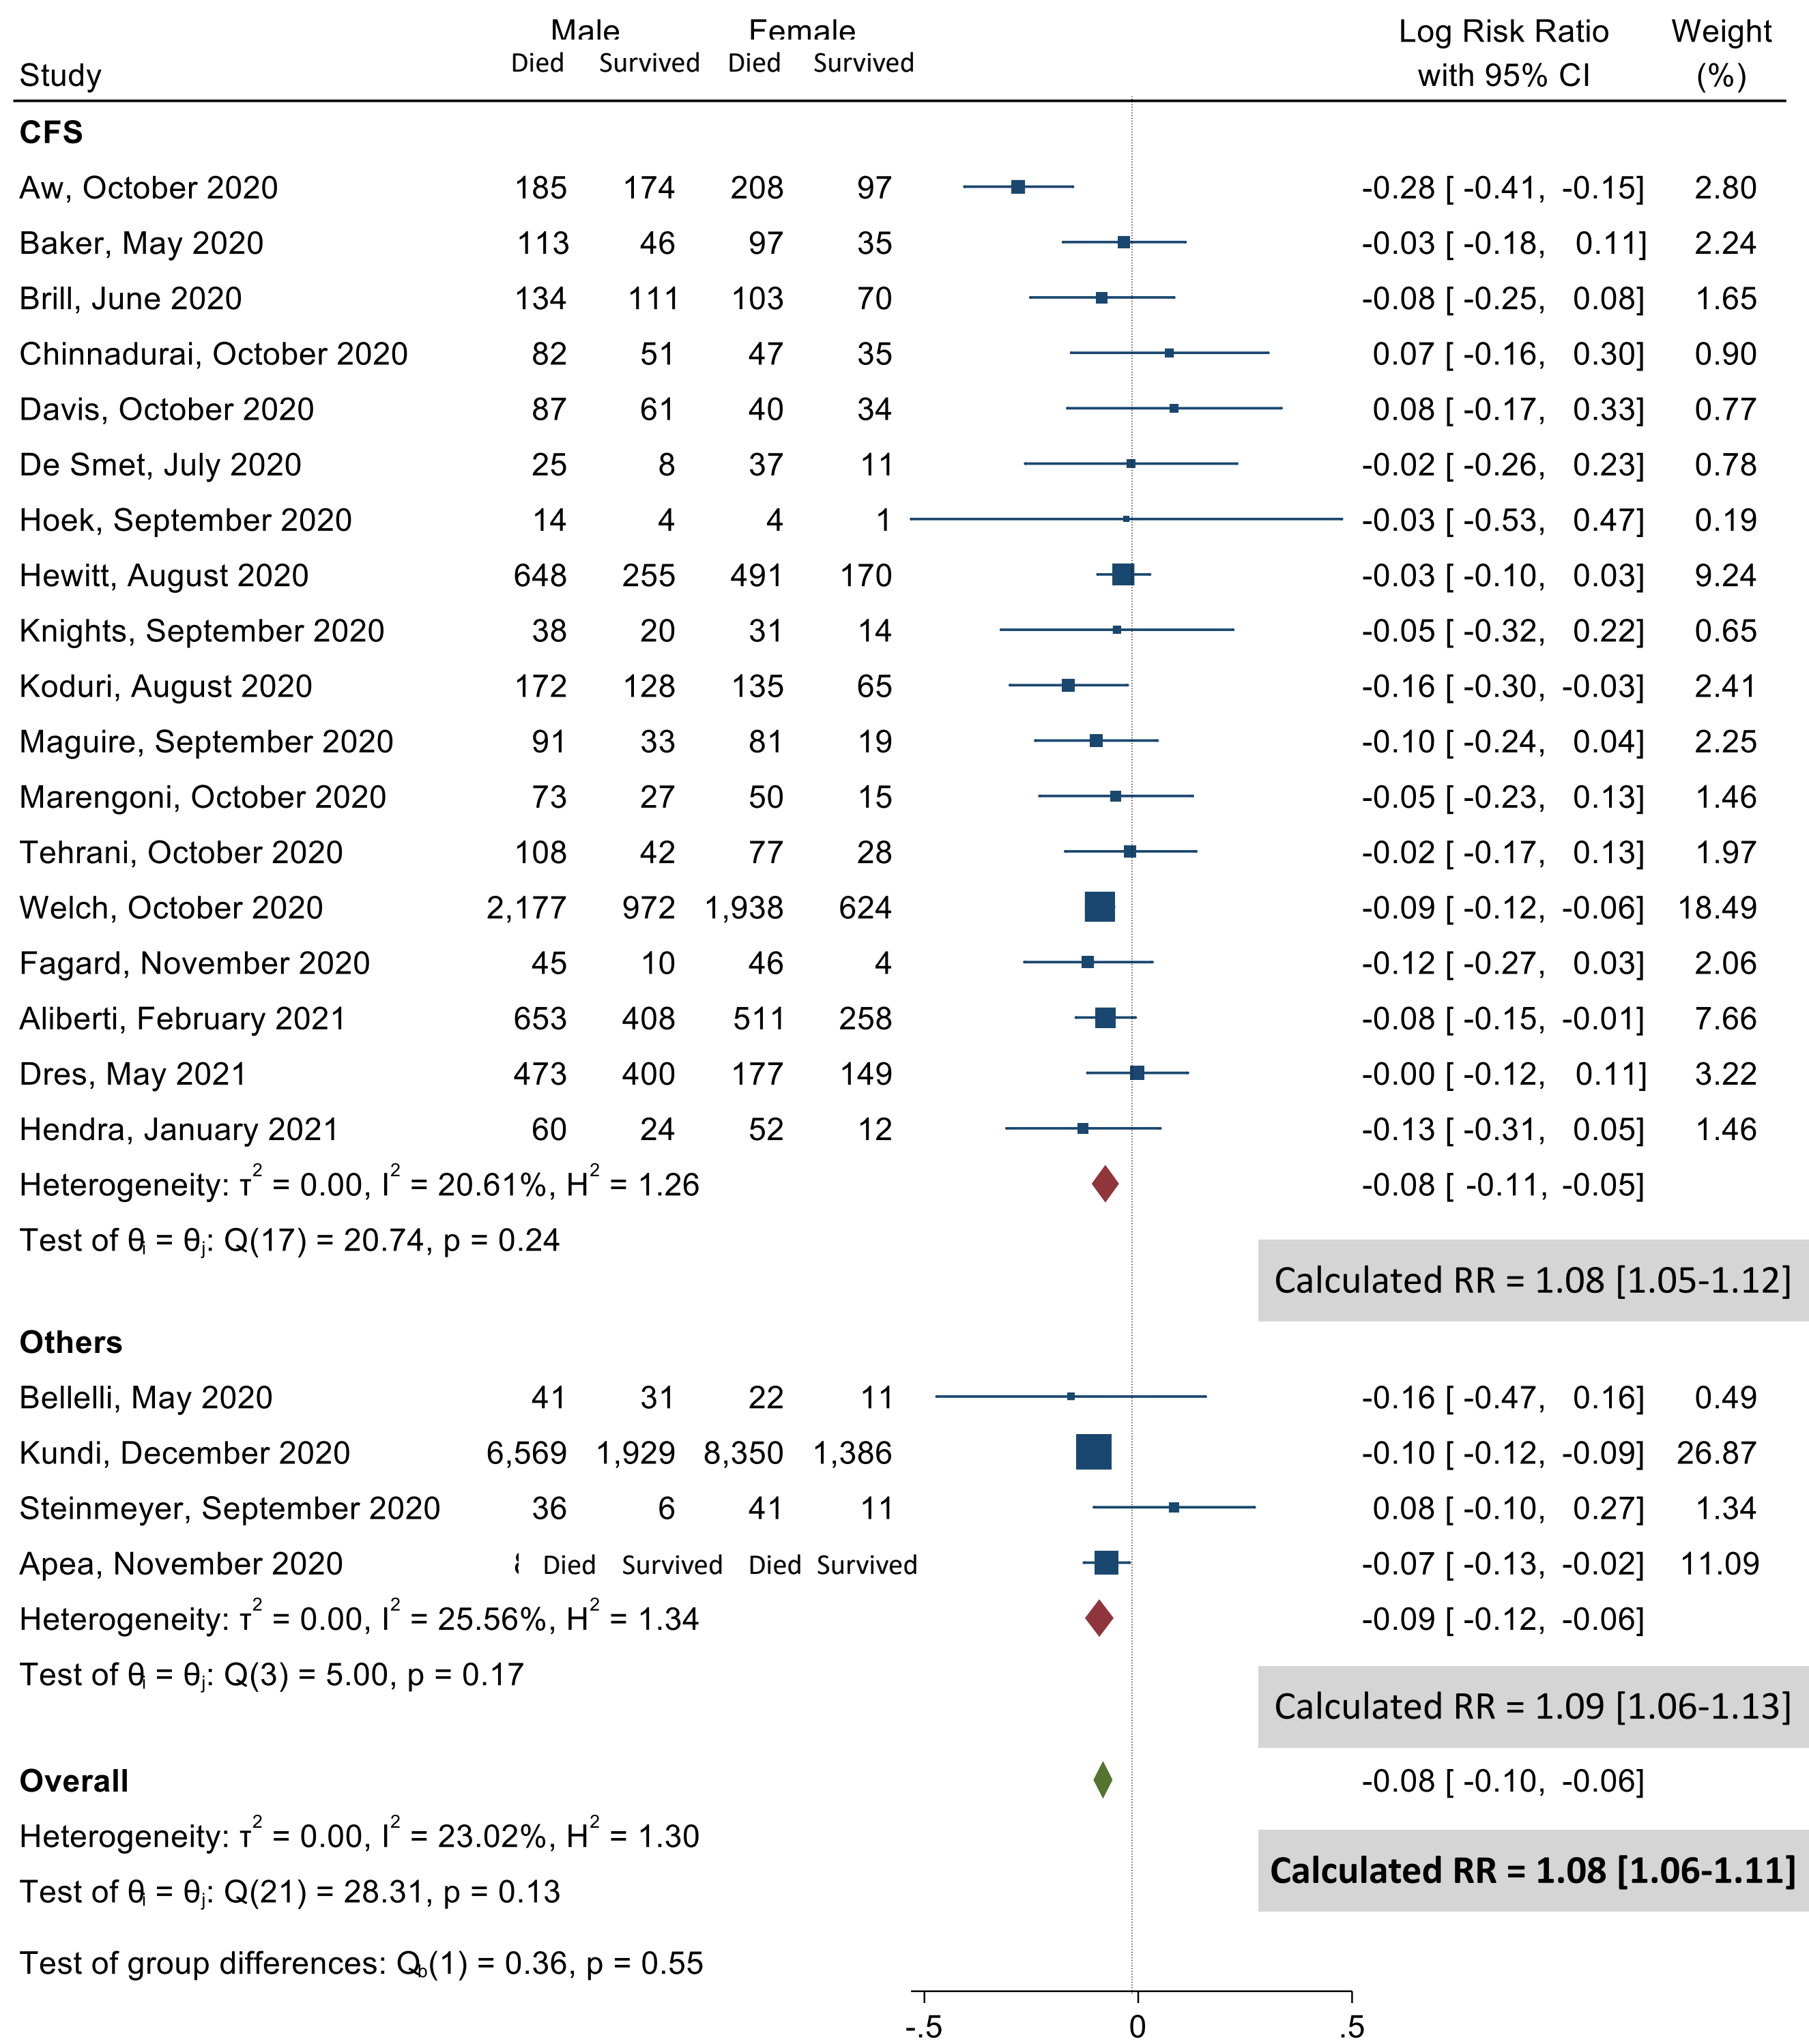

Random-effects REML model

# Supplementary Figure 7: Post Hoc Analysis CFS vs other frailty measures.

## (7c) ICU Admission

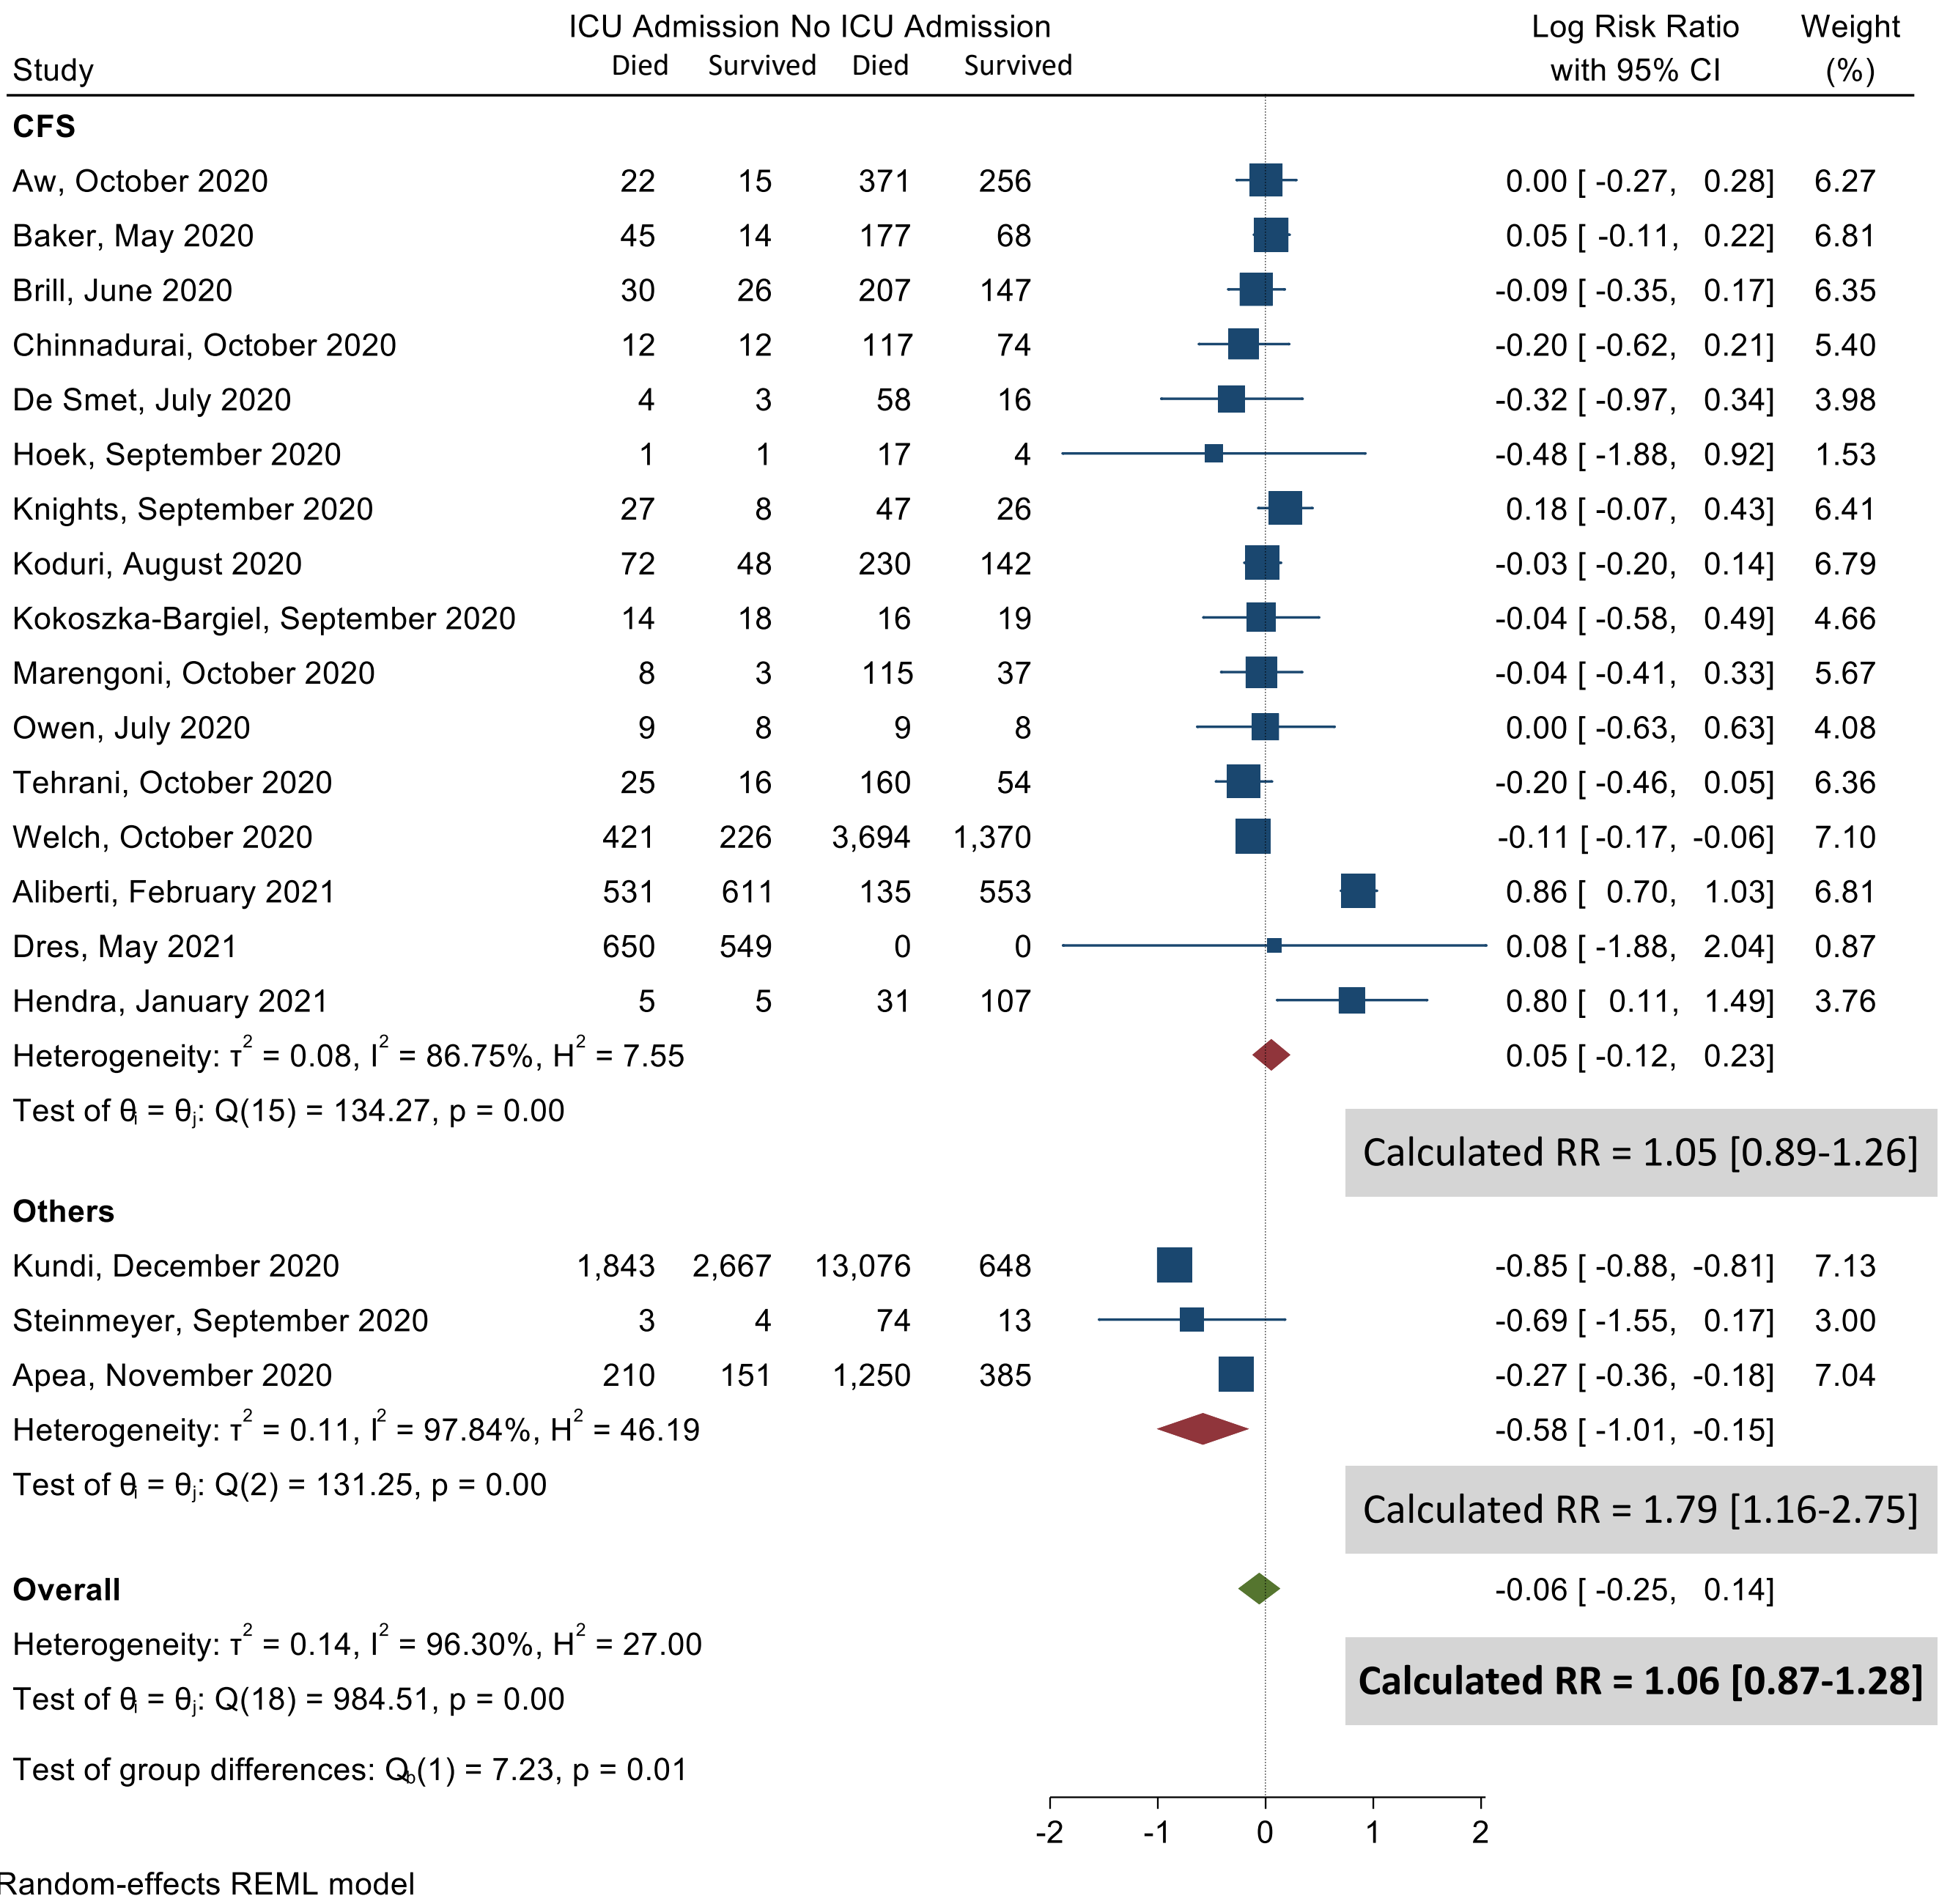

# Supplementary Figure 7: Post Hoc Analysis CFS vs other frailty measures.

## (7d) Invasive Mechanical Ventilation

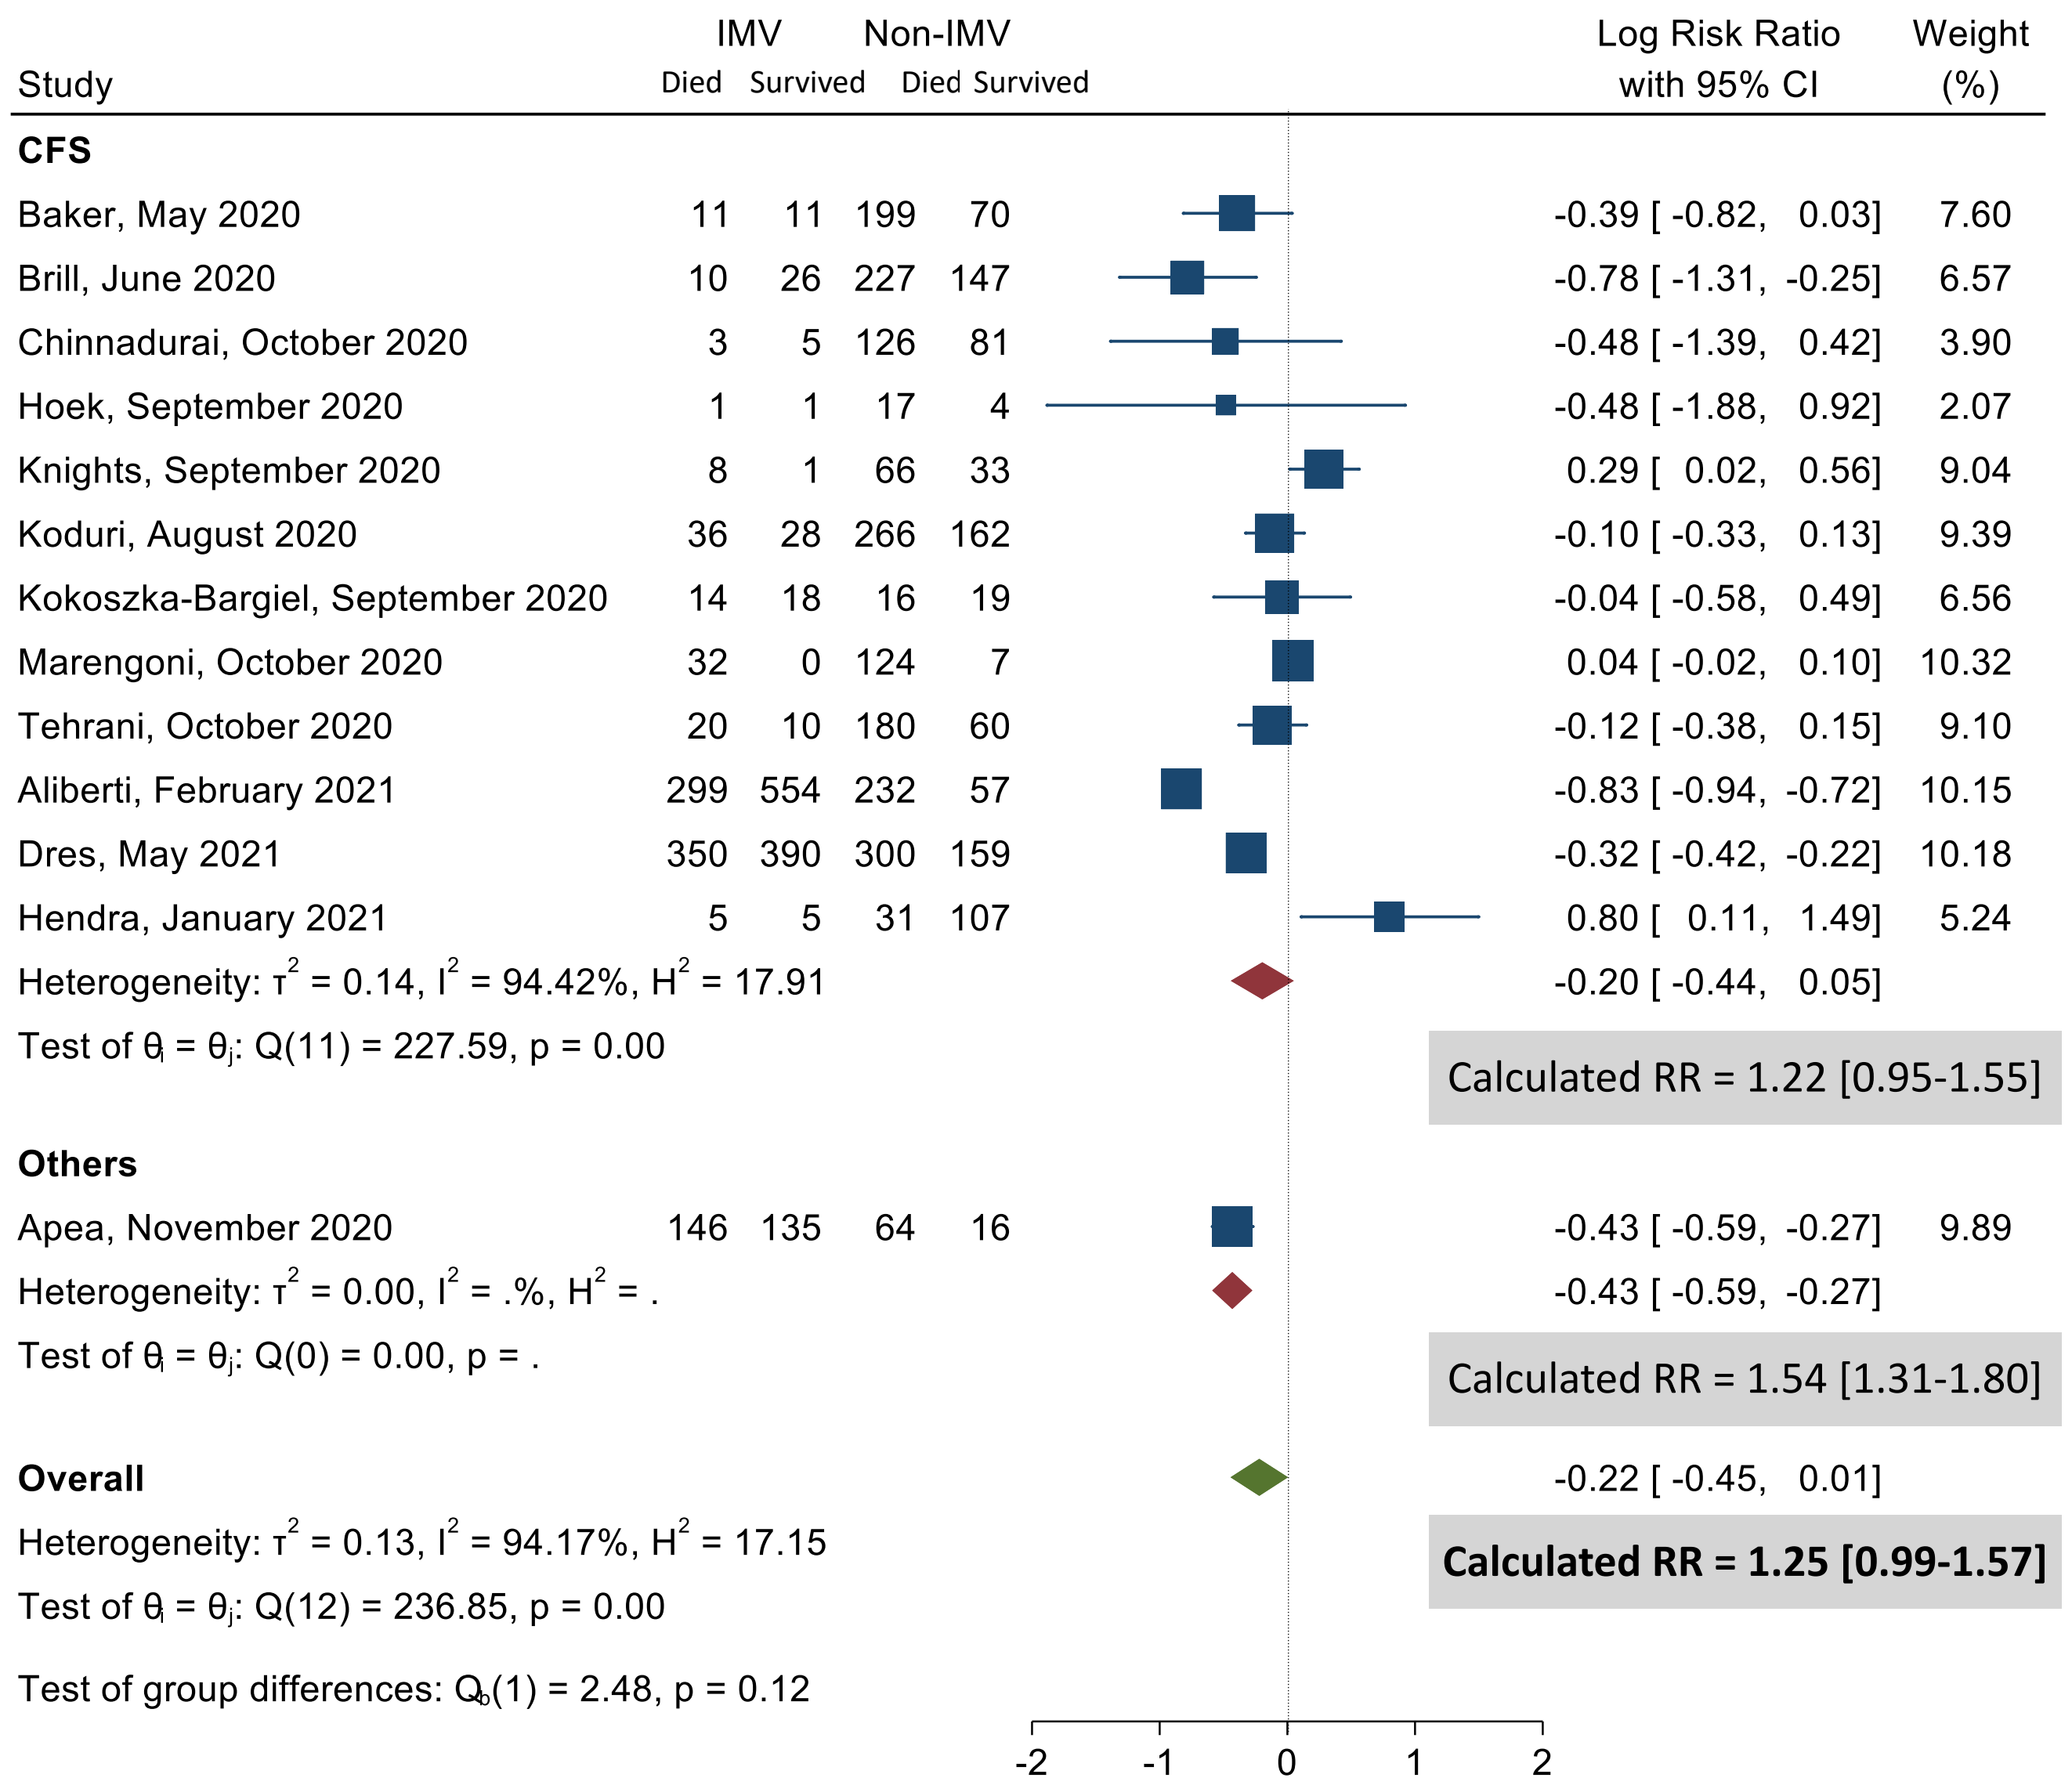

Random-effects REML model

# Supplementary Figure 8: Post hoc sensitivity analysis using only CFS: Risk associated with increased frailty: CFS 1-3 (reference) with increasing CFS scores.

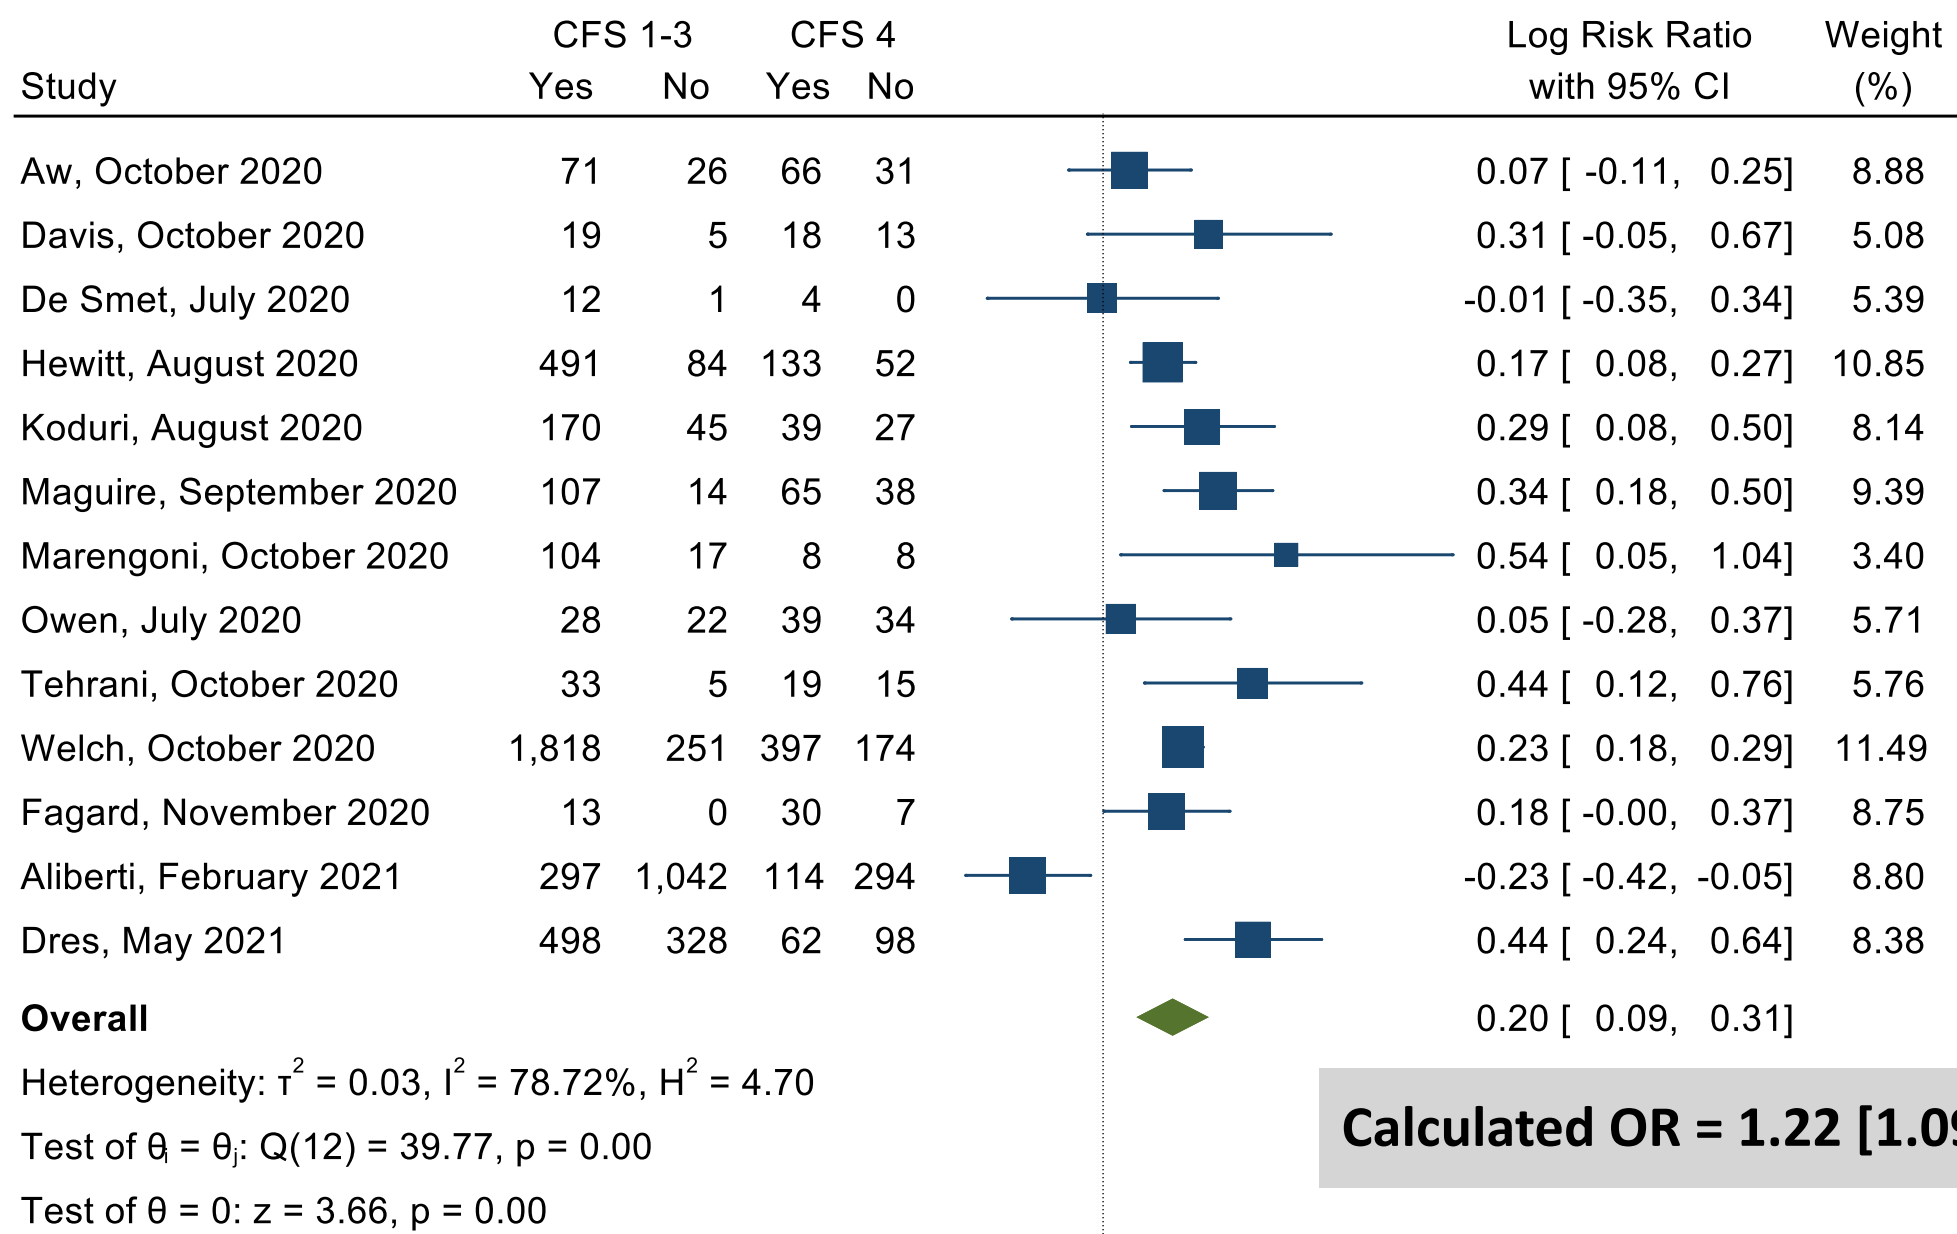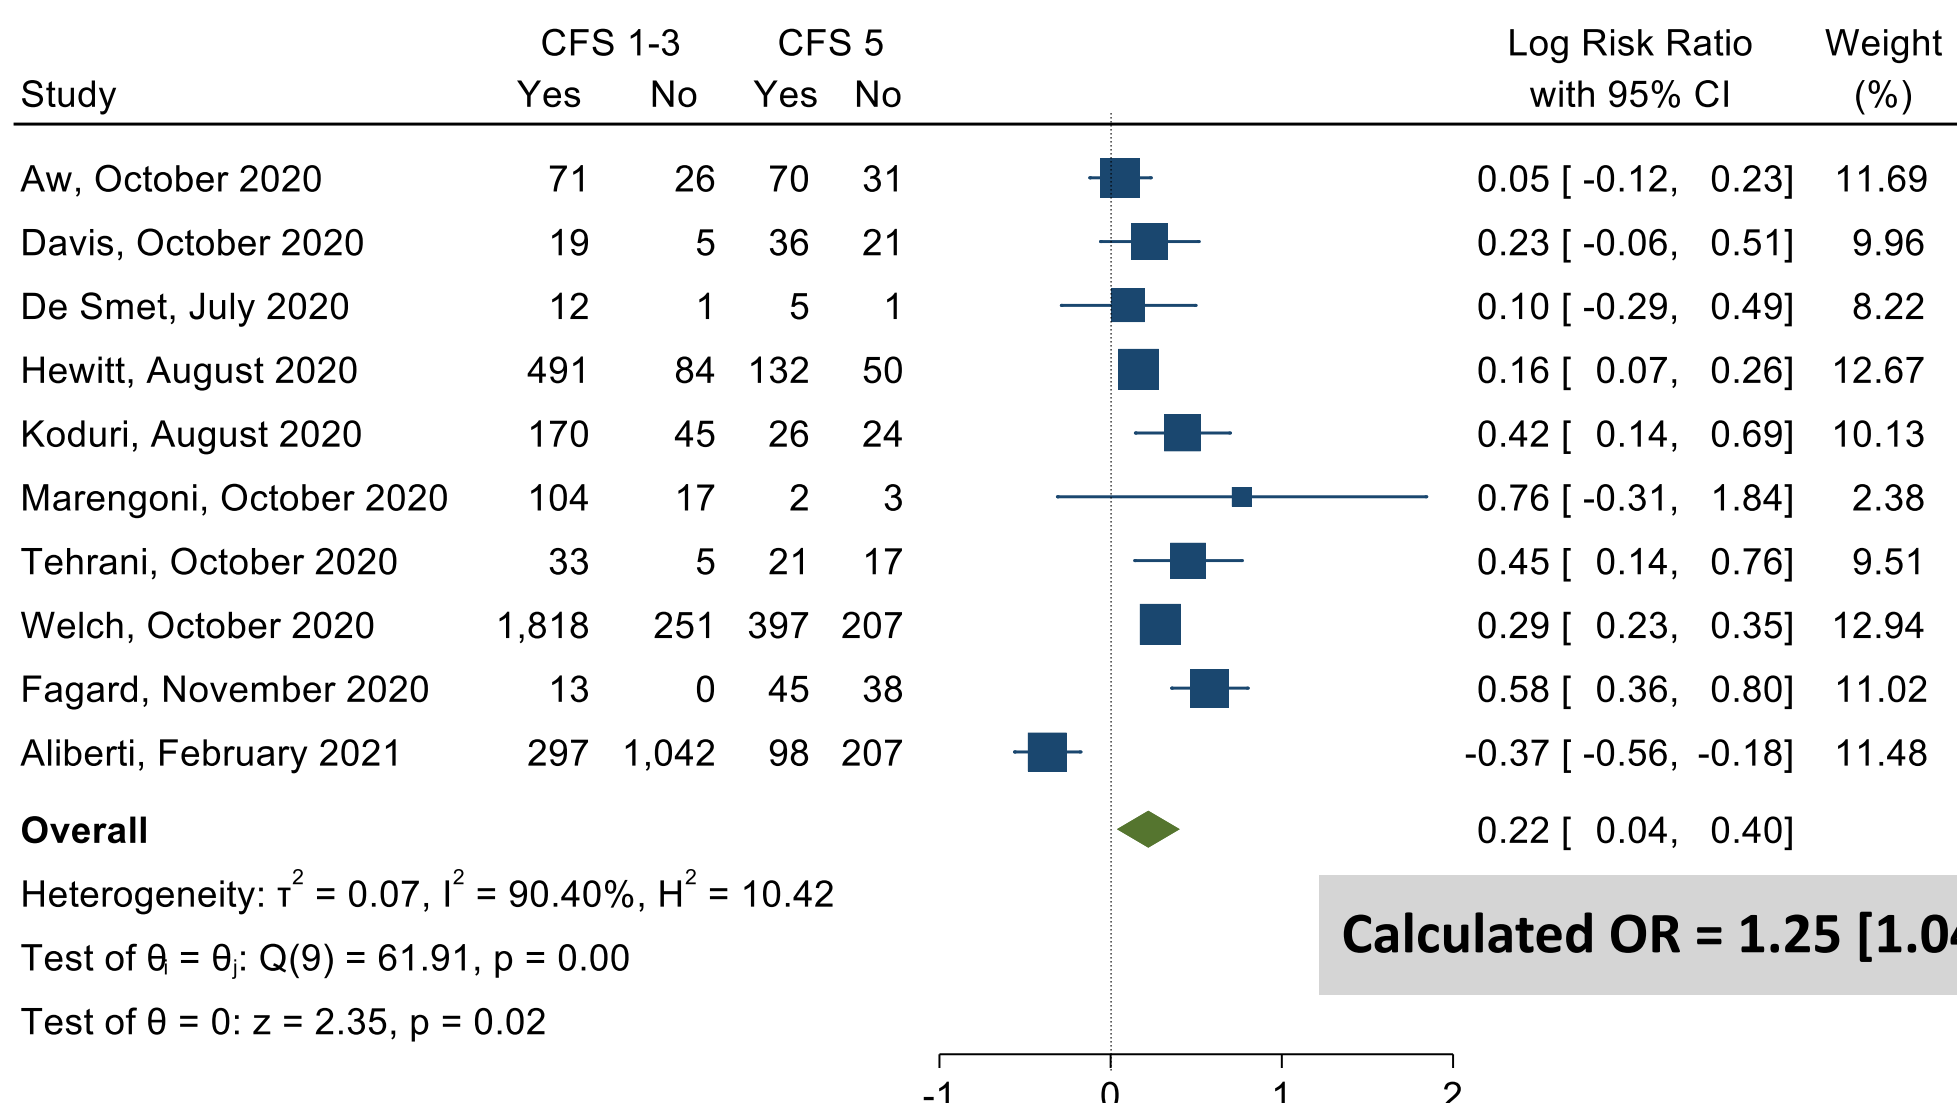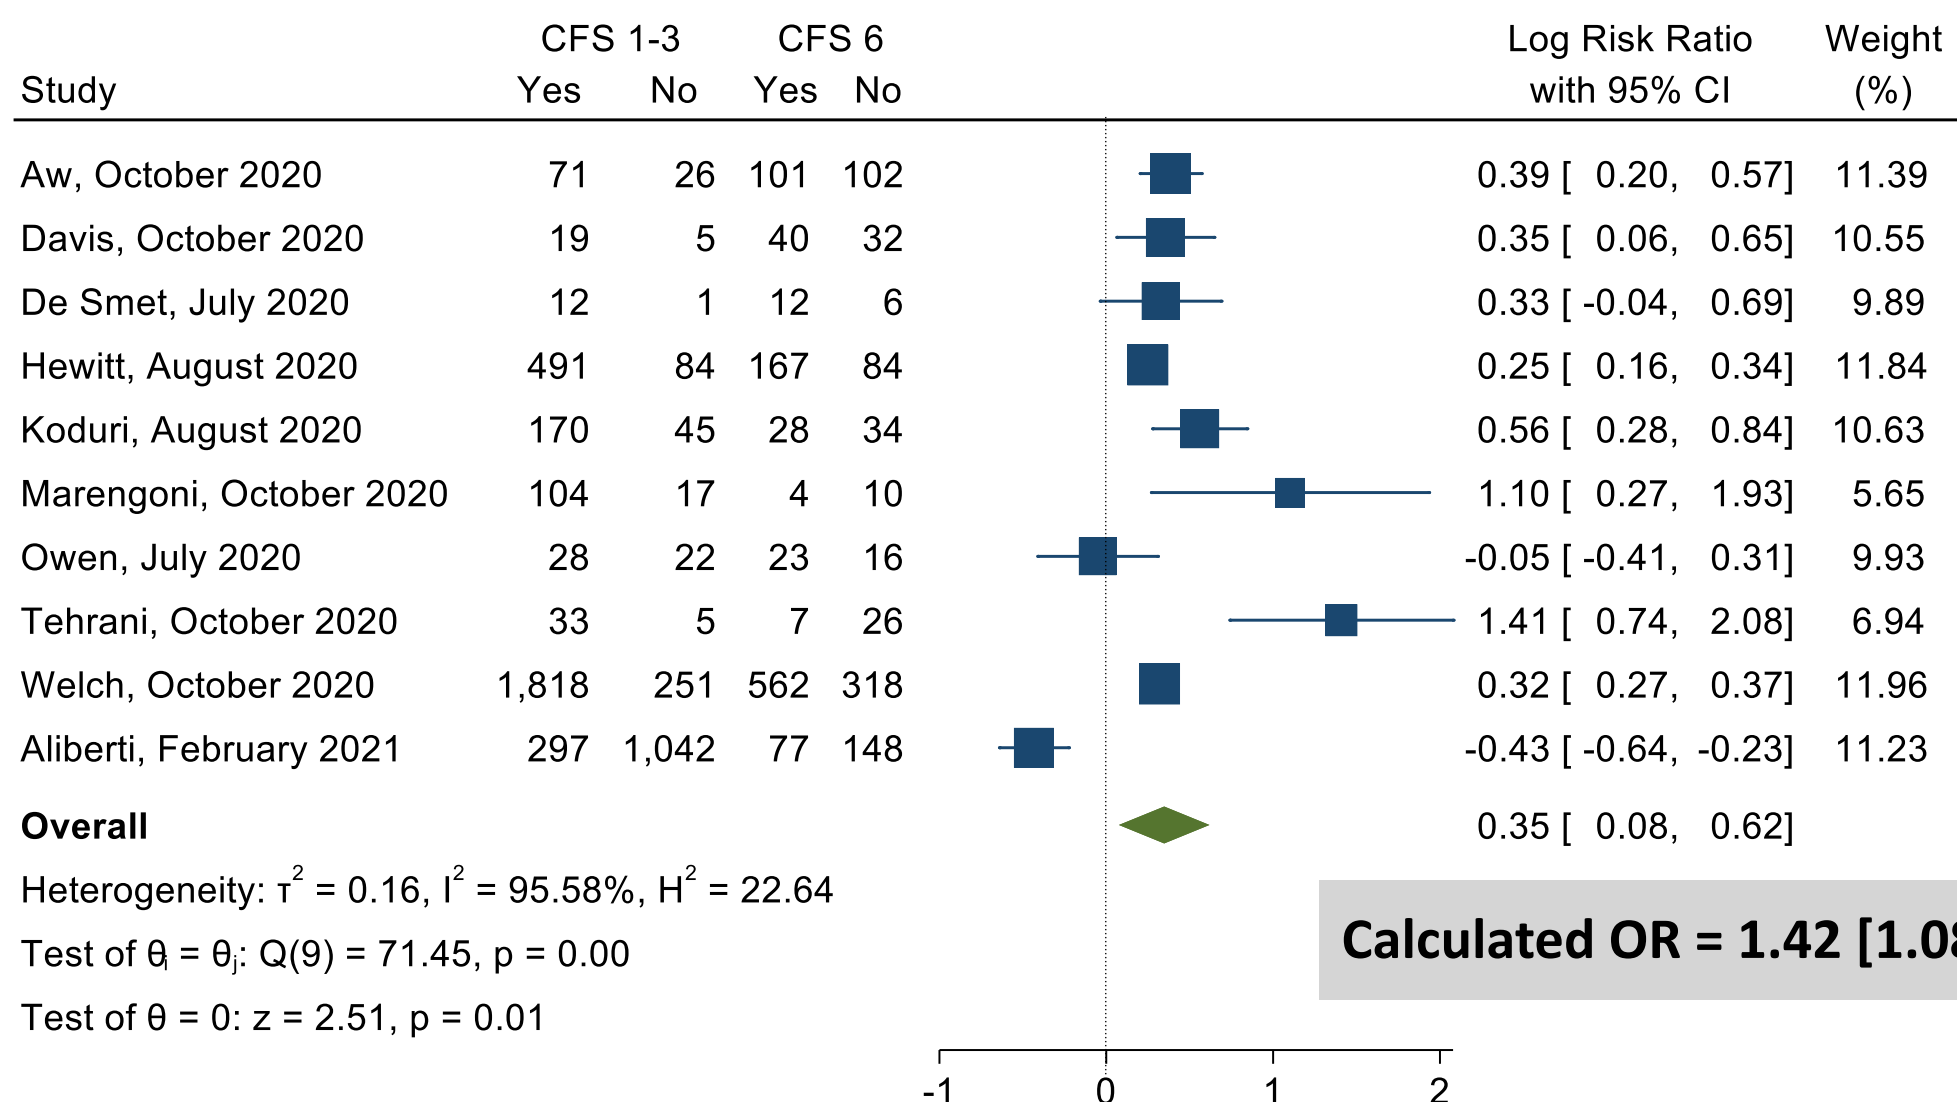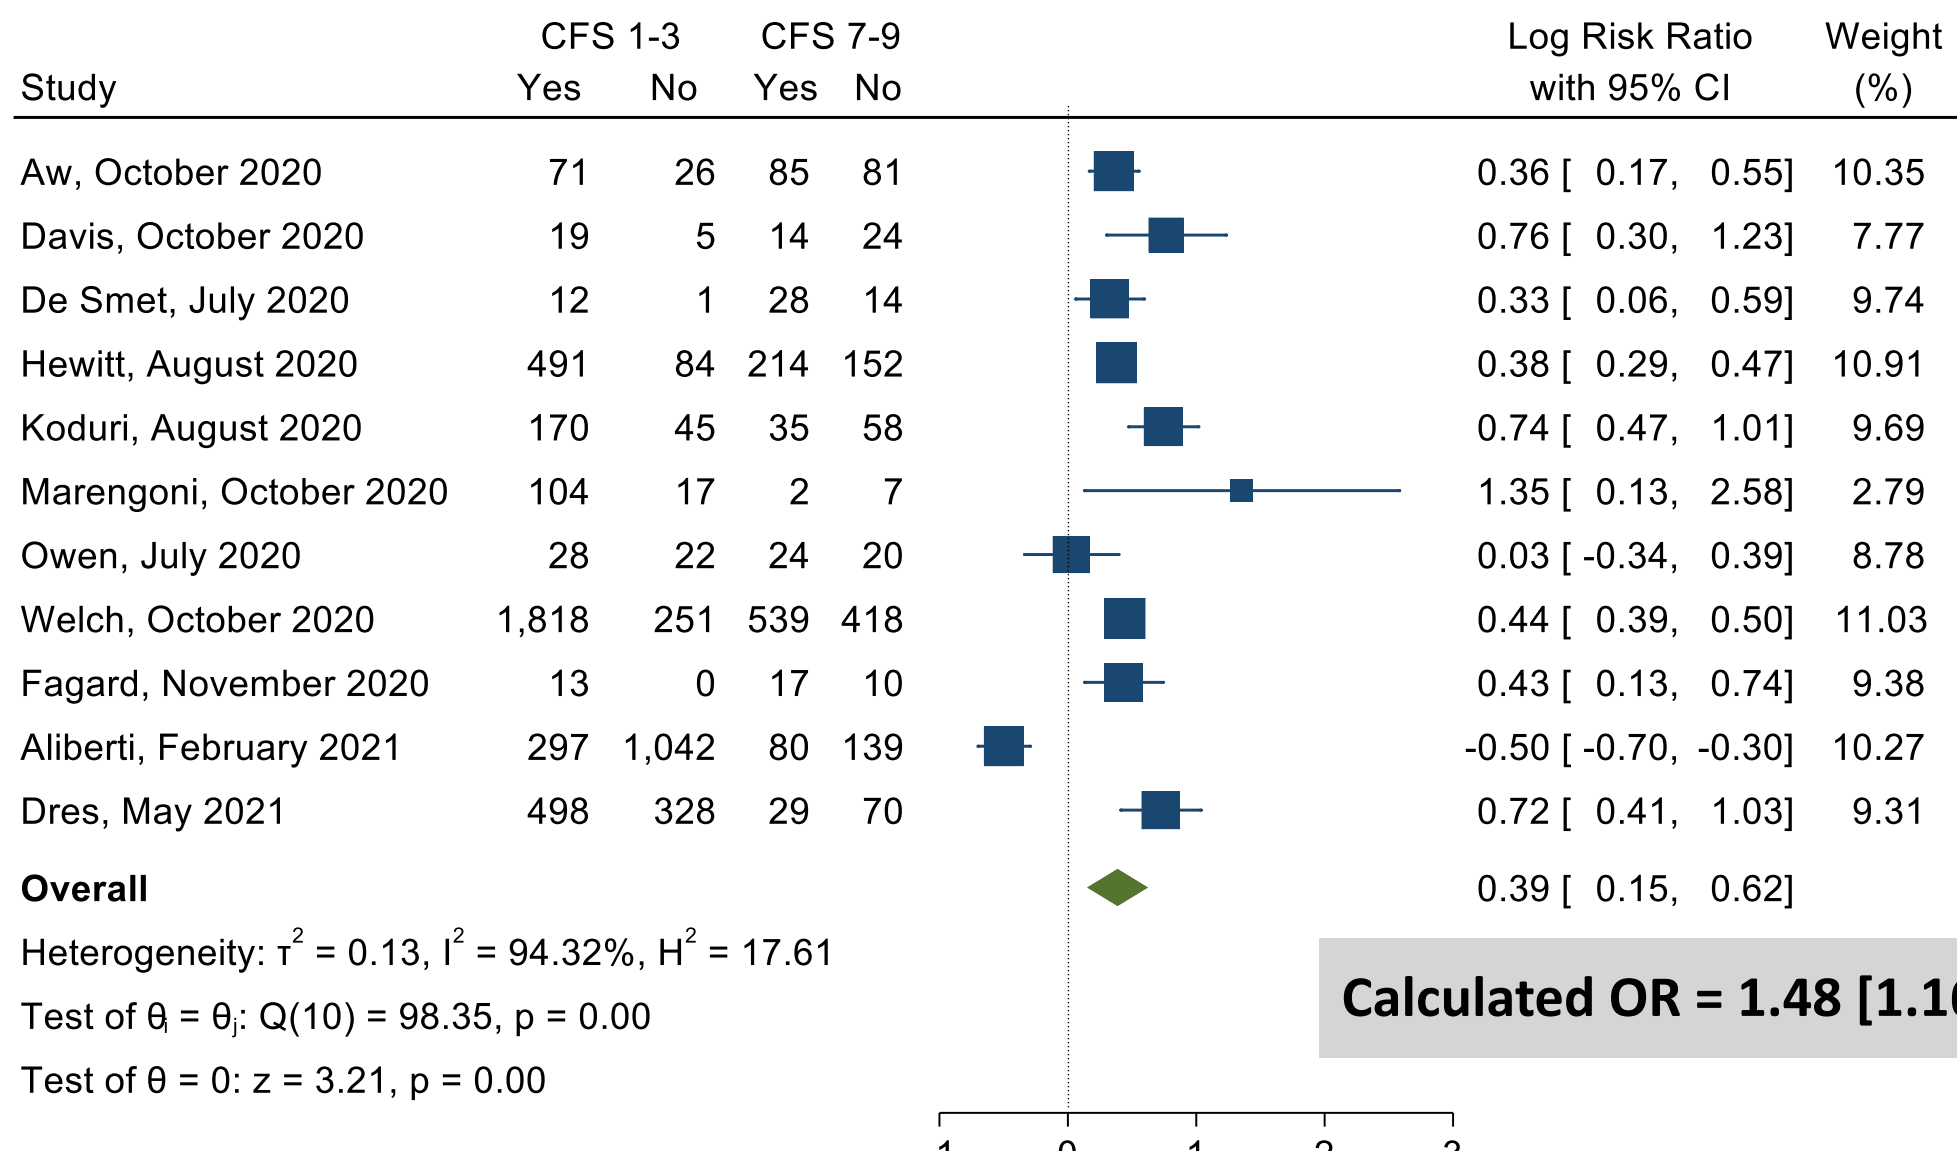

Supplement: IMJ-52-724-s001.pdf [file IMJ-52-724-s001.pdf]
